# Supplementary material for: Elevation of troponin I in acute ischemic stroke
Source: PeerJ. 2016 Apr 11;4:e1866. doi: 10.7717/peerj.1866 (PMC4830242; doi:10.7717/peerj.1866)
Supplement: Supplemental Information 1 [file peerj-04-1866-s001.xlsx]

## Sheet: Troponin 1-total-V2
Sex	Age	Trop	SBP	DBP	HR	NIHa	NIHd	TOAST	Hb	Ht	WBC	Glu	BUN	Cr	Deter	BId	mRSd	mRSd2	mRSd3	Tn0.01	Trop3	SexF	Age76	HR82	WBC8320	Hb13.1	Ht38.7	BUN24.2	Cr1.52	NIH12	Death	Day	Tn0.1
1	68.8959	0.01	168	128	166	1	0	2	17.1	48	5800	116	22	1.2	0	100	0	0	0	0	0	0	0	1	0	0	0	0	0	0	0	7	0
1	77.611	0.01	173	78	88	1	0	2	13.6	40	6340	95		1.5	0	100	0	0	0	0	0	0	1	1	0	0	0	0	0	0	0	8	0
1	72.5836	0.01	248	136	84	17	0	2	14.2	42	6260	116		1.5	0	100	0	0	0	0	0	0	0	1	0	0	0	0	0	1	0	7	0
1	74.0247	0.01	188	133	76	3	0	2	14.9	42	8530		15	1.1	0	100	0	0	0	0	0	0	0	0	1	0	0	0	0	0	0	13	0
1	71.3699	0.01	162	98	82	1	0	2	17.2	48	10130	142		1.4	0	100	0	0	0	0	0	0	0	1	1	0	0	0	0	0	0	7	0
1	86.0822	0.01	136	76	61	15	0	2	13.7	40	9410	146	41	2	0	100	0	0	0	0	0	0	1	0	1	0	0	1	1	1	0	9	0
1	65.4082	0.01	216	151	126	3	0	2	16.6	48	6950	127		1.6	0	95	0	0	0	0	0	0	0	1	0	0	0	0	1	0	0	4	0
1	84.211	0.07	146	112	88	0	0	2	14.9	43	5690	128		1.1	0	100	0	0	0	1	1	0	1	1	0	0	0	0	0	0	0	4	0
0	85.726	0.21	182	92	76	1	0	2	14.2	44	8300	174		1.3	0	100	0	0	0	1	2	1	1	0	0	0	0	0	0	0	0	5	1
1	88.6027	0.01	160	93	77	7	0	1	13	40	5900	105	30	1.9	0	85	0	0	0	0	0	0	1	0	0	1	0	1	1	0	0	7	0
1	73	0.01	148	104	82	0	0	1	12.2	36	5880	53	36	2.6	0	100	0	0	0	0	0	0	0	1	0	1	1	1	1	0	0	4	0
1	60.8219	0.01	132	83	64	4	0	1	14.4	42	6660	166		1.1	1	100	0	0	0	0	0	0	0	0	0	0	0	0	0	0	0	7	0
1	64.1616	0.04	152	126	68	0	0	1	14	42	9270	183	14	0.9	0	100	0	0	0	1	1	0	0	0	1	0	0	0	0	0	0	3	0
1	81.5671	0.01	168	80	96	1	0	0	13.7	42	6400	126		0.9	0	100	0	0	0	0	0	0	1	1	0	0	0	0	0	0	0	4	0
0	84.7288	0.01	154	58	63	2	0	0	12.4	39	4800	130	20	0.8	0	100	0	0	0	0	0	1	1	0	0	1	0	0	0	0	0	11	0
0	71.2027	0.01	143	90	111	0	0	0	9.3	29	2700	324	23	1.2	0	100	0	0	0	0	0	1	0	1	0	1	1	0	0	0	0	13	0
0	76.8575	0.01	146	78	76	0	0	0	10	35	4700		29	1.9	0	100	0	0	0	0	0	1	1	0	0	1	1	1	1	0	0	6	0
0	62.7123	0.01	166	68	67	0	0	0	14	42	9800	132		1.2	0	100	0	0	0	0	0	1	0	0	1	0	0	0	0	0	0	5	0
0	69.4247	0.01	196	101	88	0	0	0	11.4	39	9700	151	15	0.7	0	100	0	0	0	0	0	1	0	1	1	1	1	0	0	0	0	4	0
0	79.7014	0.01	133	74	72	4	0	0	9.3	32	7100			1.4	0	75	0	0	0	0	0	1	1	0	0	1	1	0	0	0	0	2	0
0	82.2219	0.01	182	111	80	2	0	0	13.7	42	7100	137	21	1.3	0	100	0	0	0	0	0	1	1	0	0	0	0	0	0	0	0	3	0
1	63.0685	0.01	182	108	102	0	0	0	14.8	44	15000	293	19	1.4	0	100	0	0	0	0	0	0	0	1	1	0	0	0	0	0	0	4	0
1	59.1562	0.01	197	100	81	1	0	0	15.1	45	11400	419		2.3	0	100	0	0	0	0	0	0	0	0	1	0	0	0	1	0	0	11	0
1	87.2384	0.01	152	63	84	1	0	0	13.3	41	4900		13		0	100	0	0	0	0	0	0	1	1	0	0	0	0	0	0	0	3	0
1	90.3342	0.01	125	68	57	0	0	0	10	32	7500		26	1.2	0	100	0	0	0	0	0	0	1	0	0	1	1	1	0	0	0	2	0
0	45.1616	0.01	100	73	73	1	0	0	12.8	39	6200	110		0.7	0	100	0	0	0	0	0	1	0	0	0	1	1	0	0	0	0	3	0
1	81.1233	0.01	165	73	64	1	0	0	12.4	40	7900	130	14	1.1	0	100	0	0	0	0	0	0	1	0	0	1	0	0	0	0	0	3	0
0	64.189	0.01	137	81	72	0	0	0	13.4	41	5200	170		0.8	0	100	0	0	0	0	0	1	0	0	0	0	0	0	0	0	0	4	0
0	71.7096	0.01	155	80	70	0	0	0	11.6	36	5900	103	31	1.2	0	100	0	0	0	0	0	1	0	0	0	1	1	1	0	0	0	4	0
0	58.6219	0.01	144	82	84	2	0	0	12.5	37	14200			0.6	0	100	0	0	0	0	0	1	0	1	1	1	1	0	0	0	0	6	0
1	59.8493	0.01	200	98	62	1	0	0	11.1	34	6200		56	8.2	0	100	0	0	0	0	0	0	0	0	0	1	1	1	1	0	0	4	0
1	70.7753	0.01	147	75	68	0	0	0	13.3	39	15400	104		1.2	0	100	0	0	0	0	0	0	0	0	1	0	0	0	0	0	0	3	0
0	79.8521	0.01	169	83	60	3	0	0	12.2	37	7200	158			0	95	0	0	0	0	0	1	1	0	0	1	1	0	0	0	0	5	0
0	63.411	0.01	190	94	84	1	0	0	12.5	37	4800	94		0.7	0	100	0	0	0	0	0	1	0	1	0	1	1	0	0	0	0	3	0
1	54.6658	0.01	182	96	68	6	0	0	12.8	37	10200		7	1.6	0	100	0	0	0	0	0	0	0	0	1	1	1	0	1	0	0	9	0
0	75.9315	0.01	182	96	67	0	0	0	12.7	38	5400			0.7	0	100	0	0	0	0	0	1	0	0	0	1	1	0	0	0	0	8	0
1	75.8548	0.01	171	85	67	2	0	0	10.2	30	5200	118	41	2.1	0	100	0	0	0	0	0	0	0	0	0	1	1	1	1	0	0	6	0
1	89.737	0.01	124	80	58	0	0	0	14.9	43	5700	102	17	1	0	0	0	0	0	0	0	0	1	0	0	0	0	0	0	0	0	3	0
1	66.8685	0.01	126	100	72	1	0	0	11.1	32	5200	228	24	1.9	0	100	0	0	0	0	0	0	0	0	0	1	1	0	1	0	0	8	0
1	78.5068	0.01	135	77	74	2	0	0	14.8	43	9200	100	20	1.5	0	100	0	0	0	0	0	0	1	0	1	0	0	0	0	0	0	6	0
1	94.126	0.01	179	94	76	0	0	0	14.7	42	5800	102	13	0.4	0	100	0	0	0	0	0	0	1	0	0	0	0	0	0	0	0	8	0
1	85.1671	0.01	138	71	72	1	0	0	10	31	7500	199		1.1	0	100	0	0	0	0	0	0	1	0	0	1	1	0	0	0	0	4	0
1	59.337	0.01	171	109	79	2	0	0	14.3	42	8000	183	15	0.9	0	100	0	0	0	0	0	0	0	0	0	0	0	0	0	0	0	7	0
0	85.6877	0.01	167	86	73	1	0	0	16	44	6700	102	17	1.3	0	100	0	0	0	0	0	1	1	0	0	0	0	0	0	0	0	5	0
1	44.4411	0.01	133	91	103	1	0	0	14.2	43	7000	220		1.3	0	100	0	0	0	0	0	0	0	1	0	0	0	0	0	0	0	4	0
0	74.7425	0.01	139	81	65	0	0	0	14	41	5110	82	25	0.7	0	100	0	0	0	0	0	1	0	0	0	0	0	1	0	0	0	5	0
1	51.1753	0.01	84	64	106	0	0	0	13.9	40	10230	141	32	1.9	0	100	0	0	0	0	0	0	0	1	1	0	0	1	1	0	0	2	0
1	57.5205	0.01	134	84	96	10	0	0	15.4	48	17890	130	19	1.1	0	100	0	0	0	0	0	0	0	1	1	0	0	0	0	0	0	3	0
1	76.7233	0.01	142	66	62	3	0	0	14	41	4920	94	18	0.9	0	100	0	0	0	0	0	0	1	0	0	0	0	0	0	0	0	5	0
1	66.1753	0.01	185	112	108	0	0	0	14	40	6610	115	10	1	0	100	0	0	0	0	0	0	0	1	0	0	0	0	0	0	0	5	0
0	81.189	0.01	196	90	78	0	0	0	11.9	37	4910	175		0.8	0	100	0	0	0	0	0	1	1	0	0	1	1	0	0	0	0	6	0
0	64.0959	0.01	145	74	56	1	0	0	12.6	37	6000	102		1	0	100	0	0	0	0	0	1	0	0	0	1	1	0	0	0	0	6	0
1	56.4082	0.01	183	126	70	0	0	0	15.4	43	6290	122	16	1	0	100	0	0	0	0	0	0	0	0	0	0	0	0	0	0	0	1	0
1	63.5589	0.01	207	116	87	0	0	0	17.9	50	13780	124		1.3	0	100	0	0	0	0	0	0	0	1	1	0	0	0	0	0	0	4	0
0	68.1068	0.01	181	114	69	2	0	0	12.9	39	6270	103		0.8	0	100	0	0	0	0	0	1	0	0	0	1	0	0	0	0	0	11	0
0	76.1726	0.01	207	91	103	0	0	0	12.4	36	7690	272	11	0.8	1	100	0	0	0	0	0	1	1	1	0	1	1	0	0	0	0	5	0
1	57.7452	0.01	174	124	66	1	0	0	14.9	43	8020	107	16	0.9	0	100	0	0	0	0	0	0	0	0	0	0	0	0	0	0	0	3	0
1	77.2329	0.01	183	109	105	2	0	0	16.1	47	7250	160	11	1	0	95	0	0	0	0	0	0	1	1	0	0	0	0	0	0	0	7	0
1	88.1151	0.01	96	79	84	0	0	0	14.1	41	8400	97	24	1.7	0	100	0	0	0	0	0	0	1	1	1	0	0	0	1	0	0	2	0
1	85.5644	0.01	162	79	58	3	0	0	13.5	38	6000	146	21	1.3	0	95	0	0	0	0	0	0	1	0	0	0	1	0	0	0	0	7	0
1	67.6247	0.03	229	120	87	0	0	0	13.4	37	8300	226		1.6	0	100	0	0	0	1	1	0	0	1	0	0	1	0	1	0	0	6	0
1	53.8192	0.09	113	43	64	6	0	0	14.1	41	5400	120	19	1	0	100	0	0	0	1	1	0	0	0	0	0	0	0	0	0	0	4	0
0	65.8	0.22	153	78	86	8	0	0	12.6	36	7600	748	21	1.8	0	100	0	0	0	1	2	1	0	1	0	1	1	0	1	0	0	5	1
0	61.663	0.01	160	95	84	18	0	4	14.2	43	6410	108	14	0.9	0	100	0	0	0	0	0	1	0	1	0	0	0	0	0	1	0	3	0
0	73.7589	0.01	146	75	65	1	1	0	12.4	38	5600	102	15	0.5	0	100	0	0	0	0	0	1	0	0	0	1	1	0	0	0	0	7	0
1	50.0877	0.01	146	77	72	1	1	0	14.1	43	7400	132	21	1	0	100	0	0	0	0	0	0	0	0	0	0	0	0	0	0	0	4	0
1	44.2192	0.01	141	104	109	1	1	0	15.1	43	8600	123	13	1.1	0	100	0	0	0	0	0	0	0	1	1	0	0	0	0	0	0	4	0
1	56.1425	0.01	139	67	80	2	1	0	12.1	37	6300	167		0.7	0	100	0	0	0	0	0	0	0	0	0	1	1	0	0	0	0	4	0
1	53.4247	0.01	160	100	80	3	2	0	15.3	46	12300	128	17	0.8	0	100	0	0	0	0	0	0	0	0	1	0	0	0	0	0	0	4	0
0	79.1671	0.01	143	67	83	1	1	0	13.9	41	8900	203	17	0.8	0	100	1	0	0	0	0	1	1	1	1	0	0	0	0	0	0	2	0
1	79.8986	0.01	184	87	80	2	1	0	13.2	38	8500	157		0.8	0	100	0	0	0	0	0	0	1	0	1	0	1	0	0	0	0	3	0
0	70.6192	0.01	154	83	75	1	0	0	13.4	40	8990	210		0.9	0	100	0	0	0	0	0	1	0	0	1	0	0	0	0	0	0	4	0
1	54.4411	0.01	134	86	68	5	0	2	14.6	43	6600			1.2	0	100	1	0	0	0	0	0	0	0	0	0	0	0	0	0	0	5	0
1	68.8658	0.01	168	103	90	1	0	2	15.7	45	5830	445	19	1.3	0	100	1	0	0	0	0	0	0	1	0	0	0	0	0	0	0	3	0
1	74.7671	0.01	89	66	86	5	0	2	12.7	37	6490	88		1.6	0	100	1	0	0	0	0	0	0	1	0	1	1	0	1	0	0	6	0
1	75.0904	0.01	154	85	73	0	0	2	15.7	46	7180	220	22	1.5	0	100	1	0	0	0	0	0	0	0	0	0	0	0	0	0	0	17	0
1	60.9014	0.01	160	103	60	3	0	2	15.9	45	7950	139	36	1.2	0	100	1	0	0	0	0	0	0	0	0	0	0	1	0	0	0	2	0
1	63.6219	0.01	112	66	60	1	0	2	12.8	38	7410	311	16	1.1	0	100	1	0	0	0	0	0	0	0	0	1	1	0	0	0	0	4	0
1	37.3616	0.1	232	161	117	0	0	2	17.2	51	9750	175		1.2	0	100	1	0	0	1	2	0	0	1	1	0	0	0	0	0	0	8	1
0	80.7562	0.01	154	94	64	0	0	1	10.5	32	6740	228	12	1.1	0	90	1	0	0	0	0	1	1	0	0	1	1	0	0	0	0	25	0
0	76.7808	0.01	118	58	78	2	0	1	10.6	32	6530	155	18	1.2	0	100	1	0	0	0	0	1	1	0	0	1	1	0	0	0	0	11	0
0	76.3534	0.01	145	82	84	2	0	1	11.2	33	9890	141	27	1.7	0	100	1	0	0	0	0	1	1	1	1	1	1	1	1	0	0	7	0
0	74.9123	0.01	188	122	71	1	0	1	13.2	38	8640	217	25	1.3	0	95	1	0	0	0	0	1	0	0	1	0	1	1	0	0	0	18	0
1	48.7041	0.01	201	135	90	2	0	1	14	40	6740	437	23	1.5	0	100	1	0	0	0	0	0	0	1	0	0	0	0	0	0	0	6	0
0	54.9726	0.01	149	111	90	0	0	1	13.2	39	10610	119		0.7	0	100	1	0	0	0	0	1	0	1	1	0	0	0	0	0	0	4	0
1	73.3973	0.01	169	99	95	2	0	1	11.9	35	6490	122	9	1.2	0	100	1	0	0	0	0	0	0	1	0	1	1	0	0	0	0	7	0
1	54.2932	0.01	148	111	150	0	0	1	16.4	47	10100	241		1.2	0	100	1	0	0	0	0	0	0	1	1	0	0	0	0	0	0	4	0
0	70.2959	0.01	149	86	58	2	0	1	13.7	40	8110	93		1	1	95	1	0	0	0	0	1	0	0	0	0	0	0	0	0	0	11	0
1	69.6712	0.01	195	98	68	0	0	1	14	40	9990	145	24	1.9	0	100	1	0	0	0	0	0	0	0	1	0	0	0	1	0	0	6	0
1	46.4082	0.01	142	97	59	3	0	0	16.4	51	8500	92		1.1	0	100	1	0	0	0	0	0	0	0	1	0	0	0	0	0	0	9	0
1	63.3205	0.01	172	88	59	1	0	0	13.6	40	7100	124	12	1.3	0	100	1	0	0	0	0	0	0	0	0	0	0	0	0	0	0	8	0
1	62.4877	0.01	139	78	80	2	0	0	14.4	42	8500	118		1	0	100	1	0	0	0	0	0	0	0	1	0	0	0	0	0	0	2	0
1	77.2822	0.01	153	75	72	0	0	0	9.9	30	10200	214	26	1.5	0	60	1	0	0	0	0	0	1	0	1	0	1	1	0	0	0	4	0
1	85.863	0.01	148	60	57	4	0	0	12.2	34	8600	110	25	1.5	0	95	1	0	0	0	0	0	1	0	1	1	1	1	0	0	0	2	0
0	84.1205	0.01	213	82	64	1	0	0	11	35	6300	128	21	1.1	0	100	1	0	0	0	0	1	1	0	0	1	1	0	0	0	0	9	0
1	66.0055	0.01	184	108	76	0	0	0	16	48	10200	218	26	2	0	90	1	0	0	0	0	0	0	0	1	0	0	1	1	0	0	5	0
1	64.6082	0.01	165	93	57	0	0	0	16.7	50	5900	95	18	1	0	100	1	0	0	0	0	0	0	0	0	0	0	0	0	0	0	3	0
1	86.0137	0.01	149	87	88	1	0	0	14.5	42	4800	171		1.3	0	85	1	0	0	0	0	0	1	1	0	0	0	0	0	0	0	4	0
1	49.8301	0.01	165	102	57	2	0	0	17.1	50	9200	306	22	1.4	0	100	1	0	0	0	0	0	0	0	1	0	0	0	0	0	0	4	0
0	58.4877	0.01	170	87	70	5	0	0	10.5	33	6400	64	8		0	95	1	0	0	0	0	1	0	0	0	1	1	0	0	0	0	6	0
0	78.8082	0.01	183	69	62	0	0	0	11.6	35	7200	131	19	1	0	100	1	0	0	0	0	1	1	0	0	1	1	0	0	0	0	5	0
1	91.589	0.01	150	75	70	1	0	0	12.9	38	6900	109	12	0.9	0	100	1	0	0	0	0	0	1	0	0	1	1	0	0	0	0	3	0
0	64.8137	0.01	142	78	57	0	0	0	12.5	38	6200	89		1.1	0	100	1	0	0	0	0	1	0	0	0	1	1	0	0	0	0	5	0
1	61.5671	0.01	204	98	72	3	0	0	13.9	40	9500	330	13	1.1	0	95	1	0	0	0	0	0	0	0	1	0	0	0	0	0	0	19	0
0	35.9096	0.01	163	77	88	2	0	0	12.8	39	7200	113		0.7	0	100	1	0	0	0	0	1	0	1	0	1	1	0	0	0	0	2	0
1	68.8301	0.01	121	80	82	1	0	0	10.8	32	6600	128		0.9	0	100	1	0	0	0	0	0	0	1	0	1	1	0	0	0	0	2	0
1	86.3288	0.01	199	101	65	0	0	0	14.6	42	8800	106	22	1.2	0	100	1	0	0	0	0	0	1	0	1	0	0	0	0	0	0	4	0
0	82.1836	0.01	177	91	67	1	0	0	12.2	36	4500	159	16	0.7	0	100	1	0	0	0	0	1	1	0	0	1	1	0	0	0	0	3	0
0	84	0.01	136	99	115	2	0	0	13.8	40	6100	133	13	1	0	100	1	0	0	0	0	1	1	1	0	0	0	0	0	0	0	14	0
0	57.2137	0.01	189	118	82	0	0	0	14.6	42	6300	156	21	1	0	100	1	0	0	0	0	1	0	1	0	0	0	0	0	0	0	3	0
1	49.2658	0.01	202	116	97	1	0	0	17.5	48	9180	302	11	0.7	0	95	1	0	0	0	0	0	0	1	1	0	0	0	0	0	0	5	0
0	60.063	0.01	123	68	64	0	0	0	14.1	43	3920	100		0.8	0	100	1	0	0	0	0	1	0	0	0	0	0	0	0	0	0	4	0
1	71.0548	0.01	142	80	76	2	0	0	14.3	41	6080	153	32	1.6	0	100	1	0	0	0	0	0	0	0	0	0	0	1	1	0	0	5	0
1	47.5781	0.01	154	110	74	0	0	0	17.3	48	7960	143	21	1.2	0	100	1	0	0	0	0	0	0	0	0	0	0	0	0	0	0	6	0
0	84.7014	0.01	222	84	70	0	0	0	12.5	39	12530	108		1.1	0	100	1	0	0	0	0	1	1	0	1	1	0	0	0	0	0	6	0
0	55.6384	0.01	219	113	56	1	0	0	15.2	43	6600	152	12	0.9	0	100	1	0	0	0	0	1	0	0	0	0	0	0	0	0	0	5	0
0	59.1288	0.01	136	99	80	0	0	0	14.3	40	14680	130	18	1	0	85	1	0	0	0	0	1	0	0	1	0	0	0	0	0	0	2	0
0	55.4658	0.01	152	91	61	2	0	0	12.7	38	9640	95	21	0.9	0	95	1	0	0	0	0	1	0	0	1	1	1	0	0	0	0	4	0
0	57.2767	0.01	205	127	85	4	0	0	14.3	41	7350	124		1.1	0	100	1	0	0	0	0	1	0	1	0	0	0	0	0	0	0	3	0
1	76.1342	0.01	152	84	80	0	0	0	14.2	41	4200	147	24	1.5	0	100	1	0	0	0	0	0	1	0	0	0	0	0	0	0	0	3	0
1	62.8027	0.01	152	92	73	1	0	0	13.2	38	5040	109		1.2	0	100	1	0	0	0	0	0	0	0	0	0	1	0	0	0	0	5	0
0	85.3041	0.01	140	77	67	1	0	0	13.7	40	6620	150	20	0.8	0	95	1	0	0	0	0	1	1	0	0	0	0	0	0	0	0	3	0
0	81.5205	0.01	142	87	77	1	0	0	13.7	40	5530	103		0.8	0	100	1	0	0	0	0	1	1	0	0	0	0	0	0	0	0	5	0
1	57.5178	0.01	187	108	88	0	0	0	15.1	41	6540	179	10	1	0	100	1	0	0	0	0	0	0	1	0	0	0	0	0	0	0	4	0
1	48.1342	0.01	165	110	66	2	0	0	14.4	43	8760	119	10	1	0	100	1	0	0	0	0	0	0	0	1	0	0	0	0	0	0	2	0
0	65.3808	0.01	203	102	96	1	0	0	13.8	42	8450	125	17	1	0	100	1	0	0	0	0	1	0	1	1	0	0	0	0	0	0	8	0
1	48.8027	0.01	129	87	97	2	0	0	16.7	46	11430	266		0.9	0	100	1	0	0	0	0	0	0	1	1	0	0	0	0	0	0	6	0
1	56.2411	0.01	117	74	61	2	0	0	14.4	41	4360		13	1	0	100	1	0	0	0	0	0	0	0	0	0	0	0	0	0	0	3	0
1	55.4411	0.01	145	84	70	1	0	0	16	46	8300	96		0.8	0	100	1	0	0	0	0	0	0	0	0	0	0	0	0	0	0	3	0
0	95.337	0.01	184	82	62	0	0	0	13.4	39	8450	108		0.9	0	100	1	0	0	0	0	1	1	0	1	0	0	0	0	0	0	2	0
1	88.5342	0.03	161	79	79	0	0	0	11.1	34	8600	109	37	3.2	0	100	1	0	0	1	1	0	1	0	1	1	1	1	1	0	0	4	0
1	57.3781	0.01	171	103	59	1	0	4	15	44	6580	109	12	1	0	100	1	0	0	0	0	0	0	0	0	0	0	0	0	0	0	7	0
0	71.8986	0.01	146	73	86	2	0	0	11.1	34	6550	169	18	1.1	0	100	1	0	0	0	0	1	0	1	0	1	1	0	0	0	0	3	0
0	74.5315	0.01	144	73	66	0	0	0	12.8	37	4980	107		0.8	0	100	1	0	0	0	0	1	0	0	0	1	1	0	0	0	0	4	0
0	81.8192	0.01	137	81	81	0	0	0	13.1	37	8930	290	8	1	0	100	1	0	0	0	0	1	1	0	1	1	1	0	0	0	0	3	0
0	78.4767	0.01	158	68	78	1	0	0	14.2	43	7880	235	16	0.8	0	65	1	0	0	0	0	1	1	0	0	0	0	0	0	0	0	3	0
1	46.9151	0.01	157	94	82	2	0	0	13.9	41	6420	180	10	1.3	0	90	1	0	0	0	0	0	0	1	0	0	0	0	0	0	0	3	0
1	73.9288	0.04	145	74	92	0	0	0	11	34	6700	325	30	2.6	0	100	1	0	0	1	1	0	0	1	0	1	1	1	1	0	0	6	0
1	62.8082	0.04	201	132	65	0	0	0	15	45	5700	111	17	1	0	100	1	0	0	1	1	0	0	0	0	0	0	0	0	0	0	6	0
1	62.9123	0.16	185	96	94	0	0	0	12.6	37	11050	241	26	2.8	0	80	1	0	0	1	2	0	0	1	1	1	1	1	1	0	0	9	1
1	66.0082	0.01	127	90	90	2	1	2	15.1	45	8800	87	22	1.3	0	95	1	0	0	0	0	0	0	1	1	0	1	0	0	0	0	11	0
1	84.1178	0.01	166	107	76	1	1	2	15.5	45	5350	92	18	1.1	0	100	1	0	0	0	0	0	1	0	0	0	0	0	0	0	0	6	0
0	95.7425	0.01	186	81	72	2	1	2	15.2	46	7210	131	33	1.5	0	100	1	0	0	0	0	1	1	0	0	0	0	1	0	0	0	14	0
1	62.1151	0.01	161	87	94	1	1	2	17.8	50	7600	197	13	1.3	0	100	1	0	0	0	0	0	0	1	0	0	0	0	0	0	0	4	0
1	85.863	0.01	139	62	80	4	1	2	16	47	8840	120		1.1	0	95	1	0	0	0	0	0	1	0	1	0	0	0	0	0	0	3	0
0	52.6959	0.01	162	100	72	3	1	1	13.7	38	5400		5	0.9	0	95	1	0	0	0	0	1	0	0	0	0	1	0	0	0	0	5	0
1	70.8959	0.01	155	75	60	2	1	1	15.7	46	11000	120		1.4	0	95	1	0	0	0	0	0	0	0	1	0	0	0	0	0	0	7	0
0	80.5342	0.01	185	102	81	1	1	1	14.2	41	8500	212		1.3	0	100	1	0	0	0	0	1	1	0	1	0	0	0	0	0	0	6	0
1	72.0767	0.01	157	91	71	1	1	1	13.8	41	3600	112		1.1	0	100	1	0	0	0	0	0	0	0	0	0	0	0	0	0	0	5	0
0	72.1397	0.01	166	89	84	1	1	1	15.3	46	6800	168	22	1	0	100	1	0	0	0	0	1	0	1	0	0	0	0	0	0	0	4	0
1	71.8575	0.01	190	81	45	3	1	1	12.9	38	6800	101		0.9	0	100	1	0	0	0	0	0	0	0	0	1	1	0	0	0	0	9	0
1	63.1671	0.01	167	99	68	2	1	1	15.3	44	9240	216	46	4.2	0	95	1	0	0	0	0	0	0	0	1	0	0	1	1	0	0	6	0
1	42.3973	0.01	237	151	76	1	1	1	15.8	45	8970	80		1.5	0	100	1	0	0	0	0	0	0	0	1	0	0	0	0	0	0	10	0
1	52.1479	0.01	108	68	86	1	1	1	17.2	48	1360	140	23	1	0	100	1	0	0	0	0	0	0	1	0	0	0	0	0	0	0	5	0
0	76.6247	0.01	164	80	73	1	1	1	9	27	12010	147	13	0.9	0	95	1	0	0	0	0	1	1	0	1	1	1	0	0	0	0	6	0
1	52.3479	0.01	228	127	47	1	1	1	16.4	47	1350	120	27	1.8	0	100	1	0	0	0	0	0	0	0	0	0	0	1	1	0	0	2	0
0	54.1863	0.01	209	134	83	3	1	1	12.1	35	10660	117	30	1.1	0	90	1	0	0	0	0	1	0	1	1	1	1	1	0	0	0	27	0
1	50.0192	0.01	212	101	102	1	1	1	15.4	44	10590	438		1.1	0	100	1	0	0	0	0	0	0	1	1	0	0	0	0	0	0	8	0
1	81.0548	0.01	145	77	66	4	1	1	14.5	44	5580	189	15	1.1	0	100	1	0	0	0	0	0	1	0	0	0	0	0	0	0	0	3	0
0	54.8466	0.01	160	83	82	5	1	1	12.2	35	10760	173		1.1	0	100	1	0	0	0	0	1	0	1	1	1	1	0	0	0	0	16	0
1	75.8137	0.01	173	117	76	3	1	1	13.6	41	7400	82		1.1	0	100	1	0	0	0	0	0	0	0	0	0	0	0	0	0	0	4	0
0	84.0521	0.09	156	71	70	2	1	1	13.7	40	6300	161	19	0.8	0	75	1	0	0	1	1	1	1	0	0	0	0	0	0	0	0	5	0
0	75.0384	0.01	146	67	84	16	1	0	13.4	40	6900	138	31	1.4	0	95	1	0	0	0	0	1	0	1	0	0	0	1	0	1	0	4	0
1	83.5014	0.01	175	94	66	2	1	0	14.3	41	9500	115	13	1.1	0	100	1	0	0	0	0	0	1	0	1	0	0	0	0	0	0	4	0
1	79.0192	0.01	175	91	60	1	1	0	12.4	38	6100	139		1.6	0	100	1	0	0	0	0	0	1	0	0	1	1	0	1	0	0	3	0
0	60.0329	0.01	190	98	66	1	1	0	15.3	44	4800	446	14	1	0	100	1	0	0	0	0	1	0	0	0	0	0	0	0	0	0	15	0
0	62.674	0.01	164	86	54	3	1	0	17.1	50	9800	135	20	1.1	0	100	1	0	0	0	0	1	0	0	1	0	1	0	0	0	0	6	0
1	68.4904	0.01	216	97	90	4	1	0	14.1	39	4600	367	13	0.9	0	100	1	0	0	0	0	0	0	1	0	0	0	0	0	0	0	4	0
1	58.4822	0.01	181	97	78	1	1	0	16.8	48	8800	120	14	1	0	100	1	0	0	0	0	0	0	0	1	0	0	0	0	0	0	3	0
0	80.7014	0.01	218	100	68	1	1	0	11.1	35	7000	98		1.1	0	100	1	0	0	0	0	1	1	0	0	1	1	0	0	0	0	11	0
1	83.5644	0.01	139	79	90	2	1	0	10.7	33	8500	97	27	2.2	0	90	1	0	0	0	0	0	1	1	1	1	1	1	1	0	0	7	0
0	65.8548	0.01	172	88	57	4	1	0	14.4	42	6500	112		0.8	0	95	1	0	0	0	0	1	0	0	0	0	0	0	0	0	0	4	0
0	63.5397	0.01	193	96	60	3	1	0	12.3	37	7400		20	0.9	0	100	1	0	0	0	0	1	0	0	0	1	1	0	0	0	0	7	0
0	29.3808	0.01	120	74	94	4	1	0	10.2	25	9400	117		0.5	0	100	1	0	0	0	0	1	0	1	1	1	1	0	0	0	0	6	0
1	55.2849	0.01	160	83	60	2	1	0	14.1	42	9500	253	25	1.8	0	100	1	0	0	0	0	0	0	0	1	0	0	1	1	0	0	4	0
0	61.1123	0.01	160	96	65	1	1	0	19.7	60	11500	147	11	0.7	0	100	1	0	0	0	0	1	0	0	1	0	0	0	0	0	0	14	0
1	74.6712	0.01	189	98	62	10	1	0	13.2	44	7300	140	17	1.1	0	95	1	0	0	0	0	0	0	0	0	0	0	0	0	0	0	11	0
0	90.9342	0.01	199	84	78	2	1	0	12.9	38	5600	98	24	1.3	0	100	1	0	0	0	0	1	1	0	0	1	1	0	0	0	0	3	0
1	60.5315	0.01	115	76	83	1	1	0	15.2	44	1100	114	27	0.9	0	100	1	0	0	0	0	0	0	1	0	0	0	1	0	0	0	2	0
0	77.7534	0.01	131	86	80	1	1	0	15.6	44	4400	88	17	1.2	0	100	1	0	0	0	0	1	1	0	0	0	0	0	0	0	0	9	0
1	79.726	0.01	192	91	83	1	1	0	12.7	37	5000	233	16	0.8	0	100	1	0	0	0	0	0	1	1	0	1	1	0	0	0	0	3	0
0	54.5973	0.01	188	89	78	2	1	0	13.8	40	6480	357		0.9	0	100	1	0	0	0	0	1	0	0	0	0	0	0	0	0	0	7	0
1	57.7342	0.01	145	82	80	1	1	0	12	35	8250	250	23	1.7	0	100	1	0	0	0	0	0	0	0	0	1	1	0	1	0	0	8	0
1	50.6712	0.01	181	112	81	3	1	0	11.8	33	9610	198	8	0.8	0	100	1	0	0	0	0	0	0	0	1	1	1	0	0	0	0	13	0
1	46.0959	0.01	162	98	84	1	1	0	17.6	49	10670	129	15	1	0	95	1	0	0	0	0	0	0	1	1	0	0	0	0	0	0	5	0
0	80.8767	0.01	199	91	93	2	1	0	11.1	35	8910	102		0.7	0	80	1	0	0	0	0	1	1	1	1	1	1	0	0	0	0	7	0
1	85.9616	0.01	192	88	74	5	1	0	16.2	46	8150	127	16	1	0	85	1	0	0	0	0	0	1	0	0	0	0	0	0	0	0	4	0
1	42.0493	0.01	176	108	76	1	1	0	15.7	47	8300	160	14	1.1	0	100	1	0	0	0	0	0	0	0	0	0	0	0	0	0	0	4	0
1	62.7945	0.01	166	114	84	1	1	0	16.3	46	8200	142	17	1.3	0	100	1	0	0	0	0	0	0	1	0	0	0	0	0	0	0	3	0
1	65.1699	0.01	184	115	108	5	1	0	13.7	41	7960	248		1.2	0	100	1	0	0	0	0	0	0	1	0	0	0	0	0	0	0	3	0
0	77.937	0.01	153	82	76	3	1	0	13	39	6100	287		0.9	0	100	1	0	0	0	0	1	1	0	0	1	0	0	0	0	0	4	0
1	65.726	0.01	171	92	95	3	1	0	10.7	32	4840	198		1	0	95	1	0	0	0	0	0	0	1	0	1	1	0	0	0	0	5	0
1	88.7836	0.01	216	99	62	1	1	0	11.7	33	7000	167	49	3.2	0	100	1	0	0	0	0	0	1	0	0	1	1	1	1	0	0	4	0
1	40.3096	0.01	167	113	100	3	1	0	15.4	43	8770	157	13	1.3	1	100	1	0	0	0	0	0	0	1	1	0	0	0	0	0	0	8	0
1	60.8932	0.01	158	93	64	2	1	0	16	45	9590	188	20	1.2	0	95	1	0	0	0	0	0	0	0	1	0	0	0	0	0	0	6	0
0	63.6575	0.01	158	68	75	3	1	0	14	41	6450	323	16	0.9	0	100	1	0	0	0	0	1	0	0	0	0	0	0	0	0	0	6	0
0	68.2438	0.01	146	114	115	2	1	0	14.5	42	7090	198		1	0	100	1	0	0	0	0	1	0	1	0	0	0	0	0	0	0	4	0
1	51.4685	0.01	166	93	88	2	1	0	16.9	47	10020	137	12	0.8	0	100	1	0	0	0	0	0	0	1	1	0	0	0	0	0	0	10	0
0	78.8274	0.01	163	112	93	2	1	0	10.4	33	5270	117		1.1	0	100	1	0	0	0	0	1	1	1	0	1	1	0	0	0	0	13	0
1	52.3507	0.01	182	98	89	2	1	0	15.1	44	10150	97	13	1	1	95	1	0	0	0	0	0	0	1	1	0	0	0	0	0	0	2	0
1	62.7452	0.01	174	98	63	3	1	0	16.2	44	11260	231		0.8	0	95	1	0	0	0	0	0	0	0	1	0	0	0	0	0	0	5	0
0	68.0301	0.01	167	97	65	4	1	0	12.8	38	6040	110		0.9	0	100	1	0	0	0	0	1	0	0	0	1	1	0	0	0	0	4	0
0	86.9589	0.01	143	84	86	1	1	0	11.1	35	5850	129	17	1.6	0	100	1	0	0	0	0	1	1	1	0	1	1	0	1	0	0	3	0
1	58.0986	0.01	134	84	67	3	1	0	15.1	44	8290	114		1.1	0	100	1	0	0	0	0	0	0	0	0	0	0	0	0	0	0	4	0
1	84.4685	0.01	142	74	90	2	1	0	12.1	36	8340	139		2.7	0	95	1	0	0	0	0	0	1	1	1	1	1	0	1	0	0	2	0
1	59.5753	0.05	186	96	70	5	1	0	15.6	44	8630	152		1.1	0	100	1	0	0	1	1	0	0	0	1	0	0	0	0	0	0	11	0
1	68.2877	0.09	144	85	60	1	1	0	16.2	45	8000	132	17	1.3	0	100	1	0	0	1	1	0	0	0	0	0	0	0	0	0	0	3	0
1	44.663	1.85	151	91	68	2	1	0	14.8	43	11000	220		1.9	0	100	1	0	0	1	2	0	0	0	1	0	0	0	1	0	0	4	1
0	40.9699	0.01	140	65	79	5	1	3	14.4	41	25570	238	15	0.7	0	95	1	0	0	0	0	1	0	0	1	0	0	0	0	0	0	7	0
1	65.7726	0.13	122	87	64	5	1	4	15.1	41	6410	135	10	0.8	0	95	1	0	0	1	2	0	0	0	0	0	0	0	0	0	0	10	1
0	71.8767	0.01	134	97	72	4	1	0	14.8	42	8040	155		0.8	0	90	1	0	0	0	0	1	0	0	0	0	0	0	0	0	0	2	0
0	79.6521	0.01	168	95	75	6	2	2	13.4	41	5870	153	12	1.1	0	80	1	0	0	0	0	1	1	0	0	0	0	0	0	0	0	15	0
1	50.1945	0.01	188	113	111	2	2	1	15.8	45	5600	103		1	0	100	1	0	0	0	0	0	0	1	0	0	0	0	0	0	0	2	0
1	68.989	0.01	115	78	85	2	2	1	17.3	49	9800	226			0	100	1	0	0	0	0	0	0	1	1	0	0	0	0	0	0	5	0
1	75.8356	0.01	176	75	104	7	2	1	13.6	41	11500	244		1.3	0	100	1	0	0	0	0	0	0	1	1	0	0	0	0	0	0	6	0
0	84.5096	0.01	138	64	64	4	2	1	11.1	34	9600	125	12	0.9	0	85	1	0	0	0	0	1	1	0	1	1	1	0	0	0	0	9	0
1	77.063	0.01	195	106	96	2	2	1	16.4	45	5560	191	26	1.6	0	100	1	0	0	0	0	0	1	1	0	0	0	1	1	0	0	6	0
1	53.0164	0.01	161	96	81	3	2	1	17.5	50	7760	94	16	1.1	0	100	1	0	0	0	0	0	0	0	0	0	0	0	0	0	0	5	0
0	71.337	0.01	208	103	49	2	2	1	12	35	7830	123	20	1.3	0	95	1	0	0	0	0	1	0	0	0	1	1	0	0	0	0	6	0
1	81.0027	0.01	168	77	72	7	2	1	10.1	32	5180	85	29	2	0	80	1	0	0	0	0	0	1	0	0	1	1	1	1	0	0	4	0
1	63.2164	0.01	172	95	83	3	2	1	17.4	49	11020	250	25	1.3	0	100	1	0	0	0	0	0	0	1	1	0	0	1	0	0	0	13	0
1	44.7205	0.01	147	113	73	1	2	1	17.4	47	10870	338		1	0	100	1	0	0	0	0	0	0	0	1	0	0	0	0	0	0	1	0
1	69.0027	0.01	115	81	61	2	2	1	13	38	8110	102		1	0	95	1	0	0	0	0	0	0	0	0	1	1	0	0	0	0	5	0
1	45.6795	0.01	143	83	67	3	2	1	13.8	42	6910	110	18	1.7	0	100	1	0	0	0	0	0	0	0	0	0	0	0	1	0	0	2	0
0	54.9425	0.01	159	105	62	2	2	1	12.3	36	10070	126		1.2	0	100	1	0	0	0	0	1	0	0	1	1	1	0	0	0	0	25	0
1	56.6164	0.01	202	119	60	5	2	1	16.5	49	11170	145	15	1.1	0	95	1	0	0	0	0	0	0	0	1	0	0	0	0	0	0	29	0
0	65.474	0.04	191	95	80	2	2	1	11.4	35	6700	111	6	1.4	0	100	1	0	0	1	1	1	0	0	0	1	1	0	0	0	0	6	0
0	76.4027	0.01	188	75	69	4	2	0	13.2	39	10900	209		0.7	0	100	1	0	0	0	0	1	1	0	1	0	0	0	0	0	0	3	0
1	70.2986	0.01	101	55	54	2	2	0	14.9	45	5900	75	12	0.8	0	100	1	0	0	0	0	0	0	0	0	0	1	0	0	0	0	3	0
0	80.2493	0.01	149	64	75	2	2	0	12	38	7600	103		0.8	0	100	1	0	0	0	0	1	1	0	0	1	1	0	0	0	0	3	0
1	48.7452	0.01	167	95	62	5	2	0	16.5	48	10400	110		1	0	100	1	0	0	0	0	0	0	0	1	0	0	0	0	0	0	6	0
1	57.4767	0.01	208	114	80	2	2	0	17.5	49	10500	204		1.7	0	100	1	0	0	0	0	0	0	0	1	0	0	0	1	0	0	4	0
1	49.5342	0.01	171	106	86	4	2	0	13.4	41	6500	106	16	0.8	0	95	1	0	0	0	0	0	0	1	0	0	0	0	0	0	0	9	0
1	56.463	0.01	150	90	90	2	2	0	15.5	45	6800	400	11	1.1	0	100	1	0	0	0	0	0	0	1	0	0	0	0	0	0	0	6	0
1	50.0849	0.01	175	101	51	2	2	0	14.2	42	8700	116		0.9	0	100	1	0	0	0	0	0	0	0	1	0	0	0	0	0	0	3	0
1	61.3562	0.01	155	75	77	2	2	0	14.6	42	8200	100		1.1	0	100	1	0	0	0	0	0	0	0	0	0	0	0	0	0	0	3	0
0	77.5753	0.01	247	112	63	2	2	0	11.3	36	4800	98	10	0.8	0	100	1	0	0	0	0	1	1	0	0	1	1	0	0	0	0	6	0
1	77.3041	0.01	173	99	84	2	2	0	9.1	29	8200	177		1	0	100	1	0	0	0	0	0	1	1	0	1	1	0	0	0	0	3	0
0	58.9753	0.01	188	102	80	2	2	0	15.1	43	9700	129		1.4	0	100	1	0	0	0	0	1	0	0	1	0	0	0	0	0	0	5	0
1	66.2329	0.01	158	91	57	2	2	0	13.8	39	4700	131	18	1.2	0	100	1	0	0	0	0	0	0	0	0	0	0	0	0	0	0	6	0
1	48.389	0.01	188	110	84	2	2	0	15.7	43	12600	134	15	0.8	0	100	1	0	0	0	0	0	0	1	1	0	0	0	0	0	0	5	0
0	72.8877	0.01	137	97	80	5	2	0	14.9	43	10500	401	36	1.4	0	100	1	0	0	0	0	1	0	0	1	0	0	1	0	0	0	5	0
1	72.0877	0.01	225	136	94	5	2	0	16.4	46	7400	219		1.1	0	100	1	0	0	0	0	0	0	1	0	0	0	0	0	0	0	20	0
1	91.5616	0.01	186	97	83	8	2	0	11.9	38	7400	134		1.3	0	100	1	0	0	0	0	0	1	1	0	1	1	0	0	0	0	7	0
0	74.0521	0.01	198	82	82	2	2	0	13.2	39	6000	100		1.1	0	100	1	0	0	0	0	1	0	1	0	0	0	0	0	0	0	6	0
1	97.3836	0.01	155	90	82	0	2	0	13.3	39	5880	134	11	1.1	0	100	1	0	0	0	0	0	1	1	0	0	0	0	0	0	0	5	0
0	48.1342	0.01	232	130	101	4	2	0	14.3	43	9240	154	14	1	0	90	1	0	0	0	0	1	0	1	1	0	0	0	0	0	0	7	0
1	31.0137	0.01	131	79	98	2	2	0	14.7	44	6190	97	13	0.9	0	100	1	0	0	0	0	0	0	1	0	0	0	0	0	0	0	3	0
1	57.5781	0.01	151	88	74	3	2	0	15.6	45	9900	137	9	1.1	0	80	1	0	0	0	0	0	0	0	1	0	0	0	0	0	0	5	0
1	59.4575	0.01	129	86	66	3	2	0	14.5	41	9440	135	13	1.7	0	100	1	0	0	0	0	0	0	0	1	0	0	0	1	0	0	3	0
1	83.6411	0.01	185	101	58	2	2	0	12.3	37	4900	102		1.3	0	100	1	0	0	0	0	0	1	0	0	1	1	0	0	0	0	3	0
0	75.074	0.01	176	94	71	2	2	0	16.4	48	9850	87	12	0.8	0	100	1	0	0	0	0	1	0	0	1	0	0	0	0	0	0	7	0
0	57.8274	0.01	165	103	68	4	2	0	15.8	45	12240	130	13	0.8	0	100	1	0	0	0	0	1	0	0	1	0	0	0	0	0	0	2	0
1	66.2082	0.01	148	95	100	2	2	0	13.1	38	6400	97	13	1	0	90	1	0	0	0	0	0	0	1	0	1	1	0	0	0	0	20	0
1	40.8904	0.01	174	116	80	2	2	0	15	43	10720	114	10	1.2	0	100	1	0	0	0	0	0	0	0	1	0	0	0	0	0	0	3	0
0	63.3452	0.01	136	72	54	3	2	0	11.8	35	5970			1.3	0	100	1	0	0	0	0	1	0	0	0	1	1	0	0	0	0	4	0
1	32.7041	0.01	128	89	109	3	2	0	16.1	47	5380	108	14	1.1	0	100	1	0	0	0	0	0	0	1	0	0	0	0	0	0	0	1	0
1	55.8027	0.01	125	85	66	3	2	0	14.6	41	8090	184	20	1.3	0	95	1	0	0	0	0	0	0	0	0	0	0	0	0	0	0	5	0
1	64.0356	0.01	182	101	90	3	2	0	16.4	47	7510	290		1.1	0	100	1	0	0	0	0	0	0	1	0	0	0	0	0	0	0	16	0
0	78.3315	0.01	205	104	76	3	2	0	13.8	40	6230	107		0.7	0	75	1	0	0	0	0	1	1	0	0	0	0	0	0	0	0	12	0
1	78.3288	0.02	166	67	78	2	2	0	13.4	40	8800	113		0.9	0	100	1	0	0	1	1	0	1	0	1	0	0	0	0	0	0	10	0
1	75.5178	0.19	166	79	95	2	2	0	15.6	46	11800	143		1.3	0	100	1	0	0	1	2	0	0	1	1	0	0	0	0	0	0	15	1
0	80.0055	0.11	151	81	67	8	3	2	12	35	6670	96		1.6	0	100	1	0	0	1	2	1	1	0	0	1	1	0	1	0	0	1	1
1	66.3397	0.13	157	97	90	5	3	2	16.2	45	10630	308		1.3	0	100	1	0	0	1	2	0	0	1	1	0	0	0	0	0	0	6	1
1	85.0849	0.01	206	83	58	3	3	1	13.3	43	6600	70	19	1.6	0	68	1	0	0	0	0	0	1	0	0	0	0	0	1	0	0	5	0
1	81.0959	0.01	144	98	76	3	3	1	13.7	42	7400	110	19	2.2	0	100	1	0	0	0	0	0	1	0	0	0	0	0	1	0	0	3	0
1	56.0027	0.01	169	92	60	3	3	1	15.8	46	7910	348	14	1.1	0	100	1	0	0	0	0	0	0	0	0	0	0	0	0	0	0	14	0
0	92.8192	0.01	206	95	41	3	3	1	11.7	35	6300	102	12	1.1	0	100	1	0	0	0	0	1	1	0	0	1	1	0	0	0	0	12	0
1	58.7397	0.01	145	58	73	3	3	1	14.5	42	6840	274	21	1.6	0	100	1	0	0	0	0	0	0	0	0	0	0	0	1	0	0	4	0
0	73.8301	0.01	200	96	69	4	3	0	13.5	40	9100	195	17	0.9	0	100	1	0	0	0	0	1	0	0	1	0	0	0	0	0	0	22	0
1	60.0877	0.01	197	100	83	3	3	0	14.3	42	8800	94	17	1.3	0	100	1	0	0	0	0	0	0	1	1	1	1	0	0	0	0	8	0
1	66.2027	0.01	179	97	61	3	3	0	13.9	39	4200	147		0.9	0	100	1	0	0	0	0	0	0	0	0	0	0	0	0	0	0	3	0
1	65.4411	0.01	172	83	59	5	3	0	16.1	46	6800	365	13	1	0	100	1	0	0	0	0	0	0	0	0	0	0	0	0	0	0	5	0
0	55.9342	0.01	159	93	72	3	3	0	13.1	39	5000	98	8	0.7	0	100	1	0	0	0	0	1	0	0	0	1	0	0	0	0	0	5	0
1	69.3616	0.01	114	79	84	3	3	0	14.8	44	10800	158		1.8	0	100	1	0	0	0	0	0	0	1	1	0	0	0	1	0	0	5	0
1	85.1233	0.01	137	60	64	3	3	0	12.7	37	6900	182		1.5	0	95	1	0	0	0	0	0	1	0	0	1	1	0	0	0	0	8	0
1	49.2932	0.01	238	144	102	3	3	0	15.2	44	10700	132	33	2.7	0	95	1	0	0	0	0	0	0	1	1	0	0	1	1	0	0	5	0
0	71.937	0.01	168	83	52	4	3	0	16	45	10600	232	20	1	0	85	1	0	0	0	0	1	0	0	1	0	0	0	0	0	0	4	0
0	79.1479	0.01	203	105	81	3	3	0	11.1	32	5200	281	21	1	0	100	1	0	0	0	0	1	1	0	0	1	1	0	0	0	0	7	0
0	53.1945	0.01	117	68	70	4	3	0	13.7	38	8200	257	15	0.7	0	100	1	0	0	0	0	1	0	0	0	0	1	0	0	0	0	7	0
1	76.526	0.01	146	81	86	3	3	0	12.2	36	6020	166		1.2	0	95	1	0	0	0	0	0	1	1	0	1	1	0	0	0	0	6	0
1	58.5945	0.01	167	109	95	5	3	0	16.3	47	8150	122	15	1.1	0	100	1	0	0	0	0	0	0	1	0	0	0	0	0	0	0	25	0
0	78.5918	0.06	170	87	74	4	3	0	10.2	31	6340	114		5.2	0	100	1	0	0	1	1	1	1	0	0	1	1	0	1	0	0	6	0
1	56.1808	0.01	123	98	85	4	3	3	15.9	43	10110	98	27	1	0	100	1	0	0	0	0	0	0	1	1	0	0	1	0	0	0	6	0
0	86.2575	0.01	109	59	57	4	4	2	13.7	40	8000	149		1	1	80	1	0	0	0	0	1	1	0	0	0	0	0	0	0	0	11	0
1	59.6959	0.02	166	118	93	5	4	2	15.4	45	5710	123	16	1	0	100	1	0	0	1	1	0	0	1	0	0	0	0	0	0	0	7	0
0	64.8219	0.01	124	68	41	5	4	0	13.4	42	8500	144	23	1	0	95	1	0	0	0	0	1	0	0	1	0	0	0	0	0	0	6	0
1	84.2795	0.01	147	96	52	6	4	0	13	38	4700		12	1.1	0	100	1	0	0	0	0	0	1	0	0	1	1	0	0	0	0	13	0
1	63.8055	0.01	143	82	68	4	4	0	14.5	42	5900	270	15	0.7	0	100	1	0	0	0	0	0	0	0	0	0	0	0	0	0	0	6	0
1	73.7808	0.01	161	101	70	4	4	0	14.1	43	7200	135		1	0	95	1	0	0	0	0	0	0	0	0	0	0	0	0	0	0	5	0
0	82.9479	0.01	172	101	96	3	4	0	16.6	46	6800	109	13	0.7	0	85	1	0	0	0	0	1	1	1	0	0	0	0	0	0	0	6	0
1	65	0.01	193	99	62	4	4	0	14.8	43	7150	182	16	1.2	0	100	1	0	0	0	0	0	0	0	0	0	0	0	0	0	0	19	0
1	49.4904	0.03	204	138	90	8	4	0	14.6	43	12200	109	22	1.4	0	100	1	0	0	1	1	0	0	1	1	0	0	0	0	0	0	3	0
1	59.6466	0.01	176	91	57	6	5	2	18.4	50	6300	169	14	1.3	0	100	1	0	0	0	0	0	0	0	0	0	0	0	0	0	0	6	0
0	65.3945	0.06	135	88	130	12	5	2	13.6	40	7720	97	17	0.7	0	85	1	0	0	1	1	1	0	1	0	0	0	0	0	1	0	12	0
1	67.8877	0.01	149	82	67	6	5	0	13.9	40	7300	88	13	1.3	0	100	1	0	0	0	0	0	0	0	0	0	0	0	0	0	0	4	0
0	84.6164	0.01	221	93	93	7	5	0	10.2	32	6400	100		1.3	0	90	1	0	0	0	0	1	1	1	0	1	1	0	0	0	0	6	0
1	37.9123	0.06	119	76	63	13	9	2	16.1	45	9890	104	24	1	0	100	1	0	0	1	1	0	0	0	1	0	0	0	0	1	0	29	0
1	56.5178	0.01	177	112	78	2	3	1	16.9	48	11960	299	16	0.9	0	100	1	0	0	0	0	0	0	0	1	0	0	0	0	0	0	7	0
0	77.1479	0.26	163	100	85	4	4	1	11.9	36	6360	225	29	5.7	0	85	1	0	0	1	2	1	1	1	0	1	1	1	1	0	0	8	1
0	38.4411	0.01	132	77	78			0	14.2	42	10200	116		0.7	0		1	0	0	0	0	1	0	0	1	0	0	0	0	0	0	14	0
1	65.4904	0.01	157	82	75	4	4	0	16.6	46	9450	113		1.6	0	95	1	0	0	0	0	0	0	0	1	0	0	0	1	0	0	4	0
1	75.4384	0.01	198	102	74	1	3	0	14.8	42	7110	115		1	1	100	1	0	0	0	0	0	0	0	0	0	0	0	0	0	0	11	0
0	54.7123	0.01	181	109	70	0	2	0	10.3	31	4800	220	39	3.2	0	100	1	0	0	0	0	1	0	0	0	1	1	1	1	0	0	3	0
0	65.1342	0.01	146	84	98	1	1	0	13.8	41	9350	137	10	0.6	0	80	1	0	0	0	0	1	0	1	1	0	0	0	0	0	0	17	0
0	67.2137	0.01	144	102	81	1	1	0	14.7	43	7230	105		1	0	100	1	0	0	0	0	1	0	0	0	0	0	0	0	0	0	3	0
1	48.8877	0.01	143	105	100	22	3	0	15.5	44	6990	117		1.2	0	100	1	0	0	0	0	0	0	1	0	0	0	0	0	1	0	6	0
1	55.8329	0.01	131	68	71	5	5	0	15.2	44	6560	155		1.1	0	100	1	0	0	0	0	0	0	0	0	0	0	0	0	0	0	5	0
1	51.2301	0.01	147	90	60	3	3	0	14.3	42	4430	131	17	1	0	100	1	0	0	0	0	0	0	0	0	0	0	0	0	0	0	3	0
1	57.0137	0.01	192	111	78	1	0	0	15.4	44	8100	139	16	1.2	0	100	1	0	0	0	0	0	0	0	0	0	0	0	0	0	0	2	0
0	62.1616	0.01	142	91	97	3	1	0	13.4	38	9260	121		0.8	0	80	4	0	0	0	0	1	0	1	1	0	1	0	0	0	0	10	0
1	64.7945	0.01	249	152	114	0	0	0	16.1	48	5980	150		1.1	0	100	1	0	0	0	0	0	0	1	0	0	0	0	0	0	0	6	0
1	74.0164	0.01	164	79	64	4	0	1	15.2	44	6500	474		1.2	0	65	2	0	0	0	0	0	0	0	0	0	0	0	0	0	0	40	0
0	74.9699	0.01	177	84	78	1	0	0	13.3	39	10100		25	0.8	0	90	2	0	0	0	0	1	0	0	1	0	0	1	0	0	0	10	0
0	90.6219	0.01	128	81	59	2	0	0	12.6	36	6240	88		0.9	0	90	2	0	0	0	0	1	1	0	0	1	1	0	0	0	0	5	0
1	81.0877	0.01	163	96	80	1	0	0	15.1	44	5510	457		1.8	0	95	2	0	0	0	0	0	1	0	0	0	0	0	1	0	0	5	0
0	92.1452	0.01	202	89	60	1	1	2	14.3	42	6030	147		1.1	0	90	2	0	0	0	0	1	1	0	0	0	0	0	0	0	0	15	0
0	82.4822	0.01	147	79	100	2	1	1	13.2	38	10160	168	17	1.1	0	60	2	0	0	0	0	1	1	1	1	0	1	0	0	0	0	4	0
0	43.4521	0.17	210	123	64	5	1	1	11.1	38	15370	129	20	1	0	95	2	0	0	1	2	1	0	0	1	1	1	0	0	0	0	12	1
0	63.4411	0.01	182	100	114	1	1	0	15.5	43	9000	394	17	0.9	0	95	2	0	0	0	0	1	0	1	1	0	0	0	0	0	0	13	0
1	74.474	0.05	190	106	59	2	1	0	13.6	39	7870	165	8	0.9	0	80	2	0	0	1	1	0	0	0	0	0	1	0	0	0	0	6	0
1	66.9753	0.01	138	95	121	12	2	2	15.1	43	9880	151	15	1.2	0	80	2	0	0	0	0	0	0	1	1	0	0	0	0	1	0	5	0
1	57.9808	0.01	173	96	74	2	2	1	15.5	45	4100	222	13	0.7	0	95	2	0	0	0	0	0	0	0	0	0	0	0	0	0	0	10	0
0	70.1479	0.01	166	116	72	2	2	1	15.8	46	10000	175	19	0.9	0	90	2	0	0	0	0	1	0	0	1	0	0	0	0	0	0	6	0
1	58.8219	0.01	136	73	84	7	2	1	17.1	55	22970	130		1.1	0	95	2	0	0	0	0	0	0	1	1	0	0	0	0	0	0	7	0
0	78.4164	0.01	207	96	70	4	2	0	13.9	40	7400	101		0.7	0	90	2	0	0	0	0	1	1	0	0	0	0	0	0	0	0	24	0
1	89.1699	0.01	149	79	99	5	2	0	12.9	39	10500		39	2.3	0	70	2	0	0	0	0	0	1	1	1	1	1	1	1	0	0	16	0
0	58.6849	0.01	164	94	64	4	2	0	12.8	39	7200	228	10	0.7	0	85	2	0	0	0	0	1	0	0	0	1	1	0	0	0	0	6	0
1	76.8384	0.01	145	62	82	4	2	0	11.9	36	5800	147		1.1	0	95	2	0	0	0	0	0	1	1	0	1	1	0	0	0	0	12	0
0	73.674	0.01	175	84	81	4	2	0	9.3	27	10280	401	21	3.3	0	80	2	0	0	0	0	1	0	0	1	1	1	0	1	0	0	3	0
1	75.6247	0.01	112	68	72	2	2	0	15.4	42	8150	128	24	1.4	0	70	2	0	0	0	0	0	0	0	0	0	0	0	0	0	0	7	0
1	51.6986	0.01	190	121	64	3	2	0	16.7	46	8900	246	17	0.9	1	95	2	0	0	0	0	0	0	0	1	0	0	0	0	0	0	4	0
0	59.4082	0.01	142	87	83	4	2	0	9.8	29	8350	162		1	0	85	2	0	0	0	0	1	0	1	1	1	1	0	0	0	0	10	0
0	74.9562	0.01	161	86	78	8	2	0	10.2	31	2960	101		1.3	0	85	2	0	0	0	0	1	0	0	0	1	1	0	0	0	0	5	0
0	49.1644	0.01	116	88	85	5	3	2	15.2	46	15600	107	25	1	0	90	2	0	0	0	0	1	0	1	1	0	0	1	0	0	0	6	0
1	81.9288	0.01	153	82	62	4	3	2	11.4	35	9400	87		1	0	85	2	0	0	0	0	0	1	0	1	1	1	0	0	0	0	11	0
0	92.2301	0.01	168	78	76	4	3	1	8.5	26	6800	95	32	2.1	0	85	2	0	0	0	0	1	1	0	0	1	1	1	1	0	0	11	0
0	42.674	0.01	202	106	87	5	3	0	13.6	41	11100	191	13	0.9	0	90	2	0	0	0	0	1	0	1	1	0	0	0	0	0	0	5	0
0	77.4466	0.01	181	89	68	3	3	0	11.3	34	5900		16		0	90	2	0	0	0	0	1	1	0	0	1	1	0	0	0	0	27	0
0	54.6219	0.01	200	108	59	6	3	0	14.7	42	4800	308	16	0.9	0	90	2	0	0	0	0	1	0	0	0	0	0	0	0	0	0	14	0
1	81.2247	0.01	210	70	49	3	3	0	14.6	42	7760	101		1	0	80	2	0	0	0	0	0	1	0	0	0	0	0	0	0	0	14	0
1	80.6411	0.01	113	64	85	3	3	0	9.8	29	3000	102	73	7.7	0	75	2	0	0	0	0	0	1	1	0	1	1	1	1	0	0	3	0
1	83.9699	0.01	157	75	87	4	4	2	13.4	39	6000	183	15	1.6	0	100	2	0	0	0	0	0	1	1	0	0	0	0	1	0	0	8	0
1	53.874	0.01	119	70	75	23	4	1	14.9	42	9900	128		1.5	0	95	2	0	0	0	0	0	0	0	1	0	0	0	0	1	0	10	0
1	76.0521	0.01	160	86	85	4	4	0	13.8	42	7700	123	14	1.2	0	100	2	0	0	0	0	0	1	1	0	0	0	0	0	0	0	7	0
1	50.9288	0.01	200	115	67	4	4	0	14.4	43	8900	96	12	1.2	0	95	2	0	0	0	0	0	0	0	1	0	0	0	0	0	0	15	0
1	81.9041	0.01	186	83	64	4	4	0	15.9	46	9100	128	15	1.1	0	95	2	0	0	0	0	0	1	0	1	0	0	0	0	0	0	3	0
1	42.337	0.01	157	108	99	1	4	0	13.9	41	11800	185	12	0.8	0	65	2	0	0	0	0	0	0	1	1	0	0	0	0	0	0	1	0
1	69.2411	0.01	108	54	92	6	4	0	15.8	44	11900	206	54	4.2	0	90	2	0	0	0	0	0	0	1	1	0	0	1	1	0	0	12	0
0	61.8849	0.01	142	84	55	5	4	0	13.7	41	4310	111	20	0.5	0	95	2	0	0	0	0	1	0	0	0	0	0	0	0	0	0	19	0
1	54.0027	0.01	109	66	69	6	4	0	14.8	43	6960	268	23	1.2	0	90	2	0	0	0	0	0	0	0	0	0	0	0	0	0	0	15	0
0	85.4658	0.01	172	91	87	5	4	0	12.3	36	5470	185	15	1	0	90	2	0	0	0	0	1	1	1	0	1	1	0	0	0	0	4	0
0	90.526	0.01	173	99	72	5	5	2	10.9	33	8780	102	9	0.7	0	95	2	0	0	0	0	1	1	0	1	1	1	0	0	0	0	10	0
0	72.5151	0.13	201	95	66	8	5	1	10.5	32	4960	122	51	12.4	0	80	2	0	0	1	2	1	0	0	0	1	1	1	1	0	0	3	1
1	58.6055	0.01	142	89	89	8	5	0	9.1	28	10500	158	36	7.7	0	65	2	0	0	0	0	0	0	1	1	1	1	1	1	0	0	7	0
0	73.3836	0.01	187	98	78	5	5	0	13.6	39	7600	145		1.1	0	85	2	0	0	0	0	1	0	0	0	0	0	0	0	0	0	8	0
1	53.0575	0.01	167	105	73	9	5	0	14.5	41	6220	173		1.2	0	95	2	0	0	0	0	0	0	0	0	0	0	0	0	0	0	21	0
0	79.463	0.01	144	72	75	6	6	1	10.5	33	7200	200	23	1.9	0	70	2	0	0	0	0	1	1	0	0	1	1	0	1	0	0	10	0
0	61.6932	0.01	162	99	79	6	6	0	13.8	39	7800	270		0.7	0	75	2	0	0	0	0	1	0	0	0	0	0	0	0	0	0	2	0
1	62.9452	0.01	225	122	108	6	6	0	16.4	46	6630	269		1.4	0	85	2	0	0	0	0	0	0	1	0	0	0	0	0	0	0	13	0
1	55.0219	0.01	220	134	76	8	7	0	16	46	8640	125	13	1.3	0	75	2	0	0	0	0	0	0	0	1	0	0	0	0	0	0	5	0
0	69.2986	0.01	144	93	115	9	9	2	13.3	42	5700	109	19	0.9	0	100	2	0	0	0	0	1	0	1	0	0	0	0	0	0	0	10	0
1	87.9425	0.01	196	108	69	2	0	2	12.3	35	5690	210		1	0	55	3	1	0	0	0	0	1	0	0	1	1	0	0	0	0	6	0
0	81.3863	0.01	173	96	127	0	0	1	9	27	7440	192	15	1.1	0	70	3	1	0	0	0	1	1	1	0	1	1	0	0	0	0	6	0
0	85.5973	0.01	160	113	103	2	0	0	12	31	13500	130		1	0	65	3	1	0	0	0	1	1	1	1	1	1	0	0	0	0	9	0
0	72.0685	0.06	151	70	70	3	0	0	13.1	38	8410	136	58	8	0	70	3	1	0	1	1	1	0	0	1	1	1	1	1	0	0	3	0
0	48.5562	0.01	142	82	87	3	1	2	10.1	33	10200	320		0.9	0	70	3	1	0	0	0	1	0	1	1	1	1	0	0	0	0	19	0
0	83.9808	0.01	177	99	92	1	1	2	15.4	46	5250	93	22	1.5	0	80	3	1	0	0	0	1	1	1	0	0	0	0	0	0	0	5	0
0	91.0274	0.01	172	105	103	2	1	2	12.7	37	28700	99		0.9	0	85	3	1	0	0	0	1	1	1	1	1	1	0	0	0	0	13	0
1	61.5233	0.31	221	124	84	1	1	1	17.4	49	9200	179	21	1.3	0	75	3	1	0	1	2	0	0	1	1	0	0	0	0	0	0	16	1
1	53.6986	0.01	160	100	80	2	1	0	14.1	41	5700	149	12	0.8	0	80	3	1	0	0	0	0	0	0	0	0	0	0	0	0	0	15	0
0	60.6685	0.01	192	70	80	1	1	0	12.8	38	11000	225		1.5	0	80	3	1	0	0	0	1	0	0	0	1	1	0	0	0	0	14	0
1	72.0658	0.01	168	92	89	3	1	0	12.5	37	6590	612	28	1.3	0	70	3	1	0	0	0	0	0	1	0	1	1	1	0	0	0	7	0
0	81.8822	0.01	140	73	77	3	2	2	13	40	9200	217		6.3	0	65	3	1	0	0	0	1	1	0	1	1	0	0	1	0	0	3	0
1	81.0411	0.01	130	55	119	5	2	2	9.8	28	10350	138	29	2.9	0	45	3	1	0	0	0	0	1	1	1	1	1	1	1	0	0	6	0
0	85.8932	0.01	180	106	88	4	2	2	12.2	37	5410	179		1	0	65	3	1	0	0	0	1	1	1	0	1	1	0	0	0	0	5	0
1	89.2685	0.01	234	96	96	2	2	1	14	42	6400	152	12	1	0	50	3	1	0	0	0	0	1	1	0	0	0	0	0	0	0	10	0
1	79.9726	0.01	184	117	89	2	2	1	12.9	39	8900	163	46	2.2	0	65	3	1	0	0	0	0	1	1	1	1	0	1	1	0	0	16	0
0	70.537	0.01	138	80	65	3	2	1	12.8	36	7890	116		1	0	60	3	1	0	0	0	1	0	0	0	1	1	0	0	0	0	5	0
0	60.2055	0.01	150	84	79	10	2	1	13.8	39	12670	256		0.9	1	70	3	1	0	0	0	1	0	0	1	0	0	0	0	0	0	26	0
0	92.2548	0.27	145	77	80	2	2	1	10.1	30	8300	115	55	8.2	0	70	3	1	0	1	2	1	1	0	0	1	1	1	1	0	0	23	1
1	82.6658	0.01	174	96	59	5	2	0	13.4	38	4300		18	1.2	0	60	3	1	0	0	0	0	1	0	0	0	1	0	0	0	0	18	0
0	65.8658	0.01	200	100	62	2	2	0	14.5	43	7000			0.6	0	85	3	1	0	0	0	1	0	0	0	0	0	0	0	0	0	50	0
0	70.4877	0.01	146	85	74	4	2	0	14.3	40	9220	279		0.7	0	80	3	1	0	0	0	1	0	0	1	0	0	0	0	0	0	8	0
0	86.7014	0.01	161	79	84	5	2	0	13.8	41	6540	132	26	1.5	0	85	3	1	0	0	0	1	1	1	0	0	0	1	0	0	0	12	0
1	66.4603	0.01	119	83	84	8	2	0	8.5	25	7810	100		1	0	40	3	1	0	0	0	0	0	1	0	1	1	0	0	0	0	11	0
0	76.4932	0.01	153	89	80	2	2	0	14	44	6480	161		0.7	0	80	3	1	0	0	0	1	1	0	0	0	0	0	0	0	0	2	0
0	65.0438	0.01	151	89	155	3	3	2	12.8	38	8420	298		0.8	0	70	3	1	0	0	0	1	0	1	1	1	1	0	0	0	0	7	0
1	76.8411	0.01	149	87	59	3	3	1	15.3	50	11000	112		1.2	0	80	3	1	0	0	0	0	1	0	1	0	0	0	0	0	0	11	0
1	45.3781	0.01	172	113	77	6	3	1	14.5	43	5420	104	15	1.5	0	90	3	1	0	0	0	0	0	0	0	0	0	0	0	0	0	13	0
1	83.3562	0.01	138	102	71	8	3	1	13.4		8000	316	20	1.2	0	70	3	1	0	0	0	0	1	0	0	0	1	0	0	0	0	16	0
1	60.4795	0.04	203	109	50	2	3	1	15.7	46	12220	157	26	2	0	75	3	1	0	1	1	0	0	0	1	0	0	1	1	0	0	10	0
1	69.4274	0.01	168	82	53	3	3	0	10.6	35	9200	132	9	0.9	0	70	3	1	0	0	0	0	0	0	1	1	1	0	0	0	0	6	0
0	67.6164	0.01	115	56	72	5	3	0	10.1	28	10000	159		1.5	0	75	3	1	0	0	0	1	0	0	1	1	1	0	0	0	0	6	0
0	55.1151	0.01	195	96	58	5	3	0	14.4	43	6200	111		0.6	0	80	3	1	0	0	0	1	0	0	0	0	0	0	0	0	0	27	0
1	62.9945	0.01	143	79	70	3	3	0	12.7	36	8300	128	19	0.9	0	85	3	1	0	0	0	0	0	0	0	1	1	0	0	0	0	5	0
1	64.7205	0.01	151	86	82	2	3	0	17.3	49	6890	105	18	1.1	0	70	3	1	0	0	0	0	0	1	0	0	0	0	0	0	0	18	0
1	63.4164	0.01	212	130	103	5	3	0	14.9	44	9210	194		1.3	0	70	3	1	0	0	0	0	0	1	1	0	0	0	0	0	0	7	0
1	62.0932	0.01	138	92	67	3	3	0	15.2	44	5170	115	21	1.2	0	85	3	1	0	0	0	0	0	0	0	0	0	0	0	0	0	3	0
0	59.0904	0.01	180	81	62	3	3	4	11.1	31	11500	126		0.9	0	80	3	1	0	0	0	1	0	0	1	1	1	0	0	0	0	7	0
1	75.9699	0.01	108	79	61	6	4	2	15.3	45	7230	98		1.3	0	85	3	1	0	0	0	0	0	0	0	0	0	0	0	0	0	4	0
0	71.3041	0.01	160	113	103	6	4	1	14.7	42	8700	293	16	0.7	0	55	3	1	0	0	0	1	0	1	1	0	0	0	0	0	0	2	0
1	62.2685	0.01	152	87	77	6	4	1	14.5	41	8500	237	13	1.1	0	80	3	1	0	0	0	0	0	0	1	0	0	0	0	0	0	24	0
0	80.8274	0.05	188	101	96	3	4	1	10	31	7050	207		1	0	70	3	1	0	1	1	1	1	1	0	1	1	0	0	0	0	8	0
1	90.7753	0.01	131	66	60	4	4	0	10.8	32	7100	149	24	1.1	0	70	3	1	0	0	0	0	1	0	0	1	1	0	0	0	0	8	0
1	42.5068	0.01	168	105	90	6	4	0	16.4	48	5200	106	14	1.2	0	85	3	1	0	0	0	0	0	1	0	0	0	0	0	0	0	30	0
0	72.1616	0.01	154	71	64	4	4	0	13.7	41	7300	181		0.8	0	60	3	1	0	0	0	1	0	0	0	0	0	0	0	0	0	7	0
1	62.8986	0.01	173	97	67	5	4	0	15.3	43	4300		9	0.8	0	90	3	1	0	0	0	0	0	0	0	0	0	0	0	0	0	7	0
1	60.9205	0.01	162	100	81	4	4	0	16.2	45	10700	97	15	1.2	0	85	3	1	0	0	0	0	0	0	1	0	0	0	0	0	0	6	0
0	59.9534	0.01	158	89	62	4	4	0	12.9	39	5800	97	20	0.6	0	65	3	1	0	0	0	1	0	0	0	1	0	0	0	0	0	2	0
1	66.0274	0.01	162	95	60	5	4	0	15.6	44	12470	169	20	1.1	0	75	3	1	0	0	0	0	0	0	1	0	0	0	0	0	0	28	0
1	78.4164	0.01	123	61	67	6	4	0	11.4	34	14190	484	37	1.3	0	70	3	1	0	0	0	0	1	0	1	1	1	1	0	0	0	18	0
0	61.1562	0.05	227	118	78	6	4	0	14.5	42	12900	118	18	0.9	0	85	3	1	0	1	1	1	0	0	1	0	0	0	0	0	0	31	0
0	72.2959	0.01	204	92	78	4	4	0	10.4	31	8500	234		1.6	0	85	3	1	0	0	0	1	0	0	1	1	1	0	1	0	0	4	0
0	57.9479	0.01	171	87	80	4	4	0	13.6	36	7500	234	16	1.1	0	70	3	1	0	0	0	1	0	0	0	0	1	0	0	0	0	5	0
1	90.2164	0.01	152	68	61	4	4	0	11	33	7000	126	39	2.4	0	65	3	1	0	0	0	0	1	0	0	1	1	1	1	0	0	4	0
1	74.1014	0.01	177	77	80	7	5	2	13.3	39	9700	223		1.4	0	75	3	1	0	0	0	0	0	0	1	0	0	0	0	0	0	12	0
1	79.2356	0.01	164	110	93	6	5	2	17.1	48	11800	115	21	1.3	0	80	3	1	0	0	0	0	1	1	1	0	0	0	0	0	0	22	0
1	78.9973	0.08	119	85	84	10	5	2	14.1	41	5400	110	15	1.1	0	65	3	1	0	1	1	0	1	1	0	0	0	0	0	0	0	24	0
1	52.5096	0.57	123	71	89	10	5	2	18.1	53	6670	96	18	1	0	70	3	1	0	1	2	0	0	1	0	0	0	0	0	0	0	8	1
0	67.2986	0.01	222	124	87	5	5	1	16.6	48	6800	206		0.8	0	75	3	1	0	0	0	1	0	1	0	0	0	0	0	0	0	31	0
0	63.6219	0.01	195	100	57	5	5	1	14	41	4280	101	12	1	0	65	3	1	0	0	0	1	0	0	0	0	0	0	0	0	0	5	0
1	82.0027	0.01	185	103	80	3	5	1	14.4	43	7130	143		1.2	1	65	3	1	0	0	0	0	1	0	0	0	0	0	0	0	0	26	0
0	80.9205	0.01	148	73	67	5	5	0	11.6	34	4800	100		0.9	0	70	3	1	0	0	0	1	1	0	0	1	1	0	0	0	0	35	0
1	45.1315	0.01	158	98	111	7	5	0	14.8	40	5600	246	12	0.8	0	60	3	1	0	0	0	0	0	1	0	0	0	0	0	0	0	37	0
0	72.1178	0.01	164	108	61	4	5	0	14.4	44	8900	108	17	0.8	0	65	3	1	0	0	0	1	0	0	1	0	0	0	0	0	0	16	0
1	76.0959	0.01	164	74	70	14	5	0	13.7	40	5130	102		1.6	0	95	3	1	0	0	0	0	1	0	0	0	0	0	1	1	0	11	0
0	78.9945	0.01	186	106	76	5	5	0	12.7	37	4910	89		0.5	0	70	3	1	0	0	0	1	1	0	0	1	1	0	0	0	0	8	0
0	95.8959	0.01	219	132	112	5	5	0	13.9	42	6020	165		1.3	0	75	3	1	0	0	0	1	1	1	0	0	0	0	0	0	0	6	0
1	60.9507	0.01	123	92	80	3	5	0	14.4	43	8560	138		1.3	1	95	3	1	0	0	0	0	0	0	1	0	0	0	0	0	0	13	0
1	64.1479	0.29	201	94	74	10	5	0	19.6	53	9380	316		1.4	0	85	3	1	0	1	2	0	0	0	1	0	0	0	0	0	0	10	1
1	83.011	0.43	156	61	54	10	5	0	10.4	34	2900	103	18	0.9	0	55	3	1	0	1	2	0	1	0	0	1	1	0	0	0	0	16	1
1	68.9644	0.01	128	72	54	8	5	4	15.5	44	7400	103		1	0	90	3	1	0	0	0	0	0	0	0	0	0	0	0	0	0	21	0
0	70.8082	0.01	218	90	60	15	6	2	13.5	36	8100	252	20	1.2	0	75	3	1	0	0	0	1	0	0	0	0	1	0	0	1	0	11	0
1	74.8438	0.01	157	94	62	8	6	2	14	40	5880	194		1	0	70	3	1	0	0	0	0	0	0	0	0	0	0	0	0	0	9	0
0	44.2548	0.01	210	117	82	6	6	0	10.2	31	5400	199	35	2.4	0	70	3	1	0	0	0	1	0	1	0	1	1	1	1	0	0	7	0
1	85.2055	0.01	183	62	94	6	6	0	13	40	5000	138	26	1.3	0	90	3	1	0	0	0	0	1	1	0	1	0	1	0	0	0	8	0
0	63.0548	0.01	131	87	67	10	6	0	16.7	45	9750	241	13	0.6	0	55	3	1	0	0	0	1	0	0	1	0	0	0	0	0	0	32	0
1	86.8712	0.01	162	76	72	9	6	0	15.3	42	5660	192		1.1	0	60	3	1	0	0	0	0	1	0	0	0	0	0	0	0	0	7	0
1	68.4301	0.01	155	91	73	3	8	2	14.5	43	6690	122	37	1.7	1	85	3	1	0	0	0	0	0	0	0	0	0	1	1	0	0	33	0
0	75.2027	0.01	197	91	81	6	5	1	13.6	39	6830	158		1	0	80	3	1	0	0	0	1	0	0	0	0	1	0	0	0	0	13	0
0	56.3452	0.05	152	66	114	4	3	1	6.6	20	11410	237		0.8	0	100	1	1	0	1	1	1	0	1	1	1	1	0	0	0	0	12	0
1	81.737	0.32	138	70	70	5	5	1	9.3	28	8400	155	11	0.9	0	80	3	1	0	1	2	0	1	0	1	1	1	0	0	0	0	29	1
1	64.0493	0.01	203	109	65	4	4	0	15.1	43	10270	150		1	0	85	3	1	0	0	0	0	0	0	1	0	0	0	0	0	0	20	0
0	88.3616	0.01	141	84	62	14	4	0	14.4	42	7580	140		0.8	0	75	3	1	0	0	0	1	1	0	0	0	0	0	0	1	0	18	0
1	83.3068	0.01	156	80	59	2	1	0	13.4	37	6230	191		1.2	0	100	1	1	0	0	0	0	1	0	0	0	1	0	0	0	0	8	0
1	61.8986	0.01	115	76	69	6	3	0	13.6	40	6070	102	11	1	0	55	3	1	0	0	0	0	0	0	0	0	0	0	0	0	0	14	0
0	62.4575	0.01	154	97	91	3	3	0	12.8	39	6780	127	18	0.8	0	85	2	1	0	0	0	1	0	1	0	1	1	0	0	0	0	12	0
0	87.8493	0.01	197	68	47			0	13.1	39	7920	118	23	1.4	0		3	1	0	0	0	1	1	0	0	1	0	0	0	0	0	25	0
1	87.9014	0.05	148	77	86	5	5	0	14.4	43	6310	156		1.3	0	75	3	1	0	1	1	0	1	1	0	0	0	0	0	0	0	22	0
0	84.6658	0.01	146	73	73	0	0	0	11.6	35	5520	97		1.3	0	60	4	1	1	0	0	1	1	0	0	1	1	0	0	0	0	1	0
0	81.9753	0.03	143	79	61	0	0	0	10.5	32	6520	113	38	1.5	0	40	4	1	1	1	1	1	1	0	0	1	1	1	0	0	0	13	0
1	63.0795	0.58	165	103	102	5	0	0	9.7	30	9000		133	17.1	0	20	4	1	1	1	2	0	0	1	1	1	1	1	1	0	0	7	1
0	77.5288	0.01	165	84	62	1	1	1	11.7	34	8850	201		1.4	0	65	4	1	1	0	0	1	1	0	1	1	1	0	0	0	0	42	0
0	95.137	0.01	178	92	87	3	1	1	12	36	6660	175		1.3	0	65	4	1	1	0	0	1	1	1	0	1	1	0	0	0	0	12	0
0	87.7096	0.01	192	79	96	2	1	1	10.6	33	8980	221	82	4.6	0	45	4	1	1	0	0	1	1	1	1	1	1	1	1	0	0	2	0
1	74.6932	0.01	118	69	93	2	1	0	13.9	43	9800	104	18	1	0	45	4	1	1	0	0	0	0	1	1	0	0	0	0	0	0	9	0
0	91.5479	0.01	169	109	77	8	1	0	13.2	40	6460	91		1.7	0	15	4	1	1	0	0	1	1	0	0	0	0	0	1	0	0	6	0
0	81.7288	0.01	181	56	66	2	1	0	11.1	34	6300	91	16	0.9	0	65	4	1	1	0	0	1	1	0	0	1	1	0	0	0	0	14	0
0	92.1973	0.01	167	69	89	32	1	0	12.5	36	10730	238		1.3	0	20	4	1	1	0	0	1	1	1	1	1	1	0	0	1	0	11	0
0	88.3918	0.01	127	76	91	6	1	3	7.6	26	5930	126	30	1.8	0	15	4	1	1	0	0	1	1	1	0	1	1	1	1	0	0	18	0
0	75.4986	0.01	123	60	84	3	1	3	6.1	20	5250	187		1.5	0	60	4	1	1	0	0	1	0	1	0	1	1	0	0	0	0	11	0
1	68.663	0.01	165	75	54	2	2	2	14.6	42	8220	146	16	1.3	1	20	4	1	1	0	0	0	0	0	0	0	0	0	0	0	0	9	0
1	80.3534	0.01	159	95	86	6	2	1	15.8	46	7960	140	23	1.4	1	75	4	1	1	0	0	0	1	1	0	0	0	0	0	0	0	8	0
0	84.8575	0.01	190	87	67	3	2	1	13.5	38	6470	96		0.7	0	70	4	1	1	0	0	1	1	0	0	0	1	0	0	0	0	5	0
1	90.5342	0.01	151	83	101	9	2	0	11.1	34	5800	108		1	0	45	4	1	1	0	0	0	1	1	0	1	1	0	0	0	0	7	0
1	82.5808	0.01	161	98	66	5	2	0	12.4	35	6100	94	15	1.2	0	50	4	1	1	0	0	0	1	0	0	1	1	0	0	0	0	26	0
1	79.4192	0.01	180	87	59	5	2	0	13.5	39	6400	255		1.3	0	75	4	1	1	0	0	0	1	0	0	0	0	0	0	0	0	7	0
0	81.8219	0.01	156	97	72	4	2	0	12.3	36	4100			0.8	0	45	4	1	1	0	0	1	1	0	0	1	1	0	0	0	0	21	0
0	86.5123	0.01	120	58	76	5	2	0	14.6	42	6400	110	24	1	0	55	4	1	1	0	0	1	1	0	0	0	0	0	0	0	0	6	0
1	58.9041	0.01	206	107	91	5	2	0	13.9	38	7700	599	36	1.8	0	55	4	1	1	0	0	0	0	1	0	0	1	1	1	0	0	41	0
0	72.5397	0.01	240	112	93	9	2	0	14.9	44	7140	115	16	1	0	55	4	1	1	0	0	1	0	1	0	0	0	0	0	0	0	57	0
1	44.7479	0.01	154	101	65	2	2	0	15.6	48	7400	120	12	1.1	1	65	4	1	1	0	0	0	0	0	0	0	0	0	0	0	0	54	0
0	88.3781	0.01	165	77	96	2	2	0	11.5	36	13680	229	15	0.9	0	60	4	1	1	0	0	1	1	1	1	1	1	0	0	0	0	6	0
1	88.3616	0.01	193	90	82	3	2	0	10.6	31	7700	164	41	3.1	0	85	4	1	1	0	0	0	1	1	0	1	1	1	1	0	0	30	0
1	68.3616	0.1	196	103	74	4	2	0	12.8	38	7000	471	20	2.3	0	55	4	1	1	1	2	0	0	0	0	1	1	0	1	0	0	28	1
1	86.4575	0.13	186	109	88	6	2	0	15.3	45	8710	113	11	1	0	65	4	1	1	1	2	0	1	1	1	0	0	0	0	0	0	30	1
0	80.9699	0.01	139	82	80	2	2	0	11.7	34	12500	117	17	1	0	40	4	1	1	0	0	1	1	0	1	1	1	0	0	0	0	4	0
1	83.6493	0.01	193	92	65	6	3	2	12.7	35	5140	258	25	1.3	1	65	4	1	1	0	0	0	1	0	0	1	1	1	0	0	0	27	0
1	76.5753	0.01	172	108	115	6	3	2	16.6	47	7330	107	23	1.3	0	45	4	1	1	0	0	0	1	1	0	0	0	0	0	0	0	18	0
0	46.4	0.01	153	78	96	3	3	1	13.6	39	16160	318		1	0	60	4	1	1	0	0	1	0	1	1	0	0	0	0	0	0	27	0
0	89.6712	0.01	168	56	74	7	3	1	13	39	9950	188		1.2	0	25	4	1	1	0	0	1	1	0	1	1	1	0	0	0	0	43	0
1	73.5397	0.01	215	104	66	3	3	1	12.2		4740	171		4.2	0	60	4	1	1	0	0	0	0	0	0	1	1	0	1	0	0	4	0
0	86.137	0.01	171	97	89	3	3	0	11.3	36	6300		10	0.8	0	50	4	1	1	0	0	1	1	1	0	1	1	0	0	0	0	6	0
1	61.337	0.01	109	69	70	6	3	0	13.6	39	8400	103	12	1	0	55	4	1	1	0	0	0	0	0	1	0	0	0	0	0	0	29	0
1	69.8548	0.01	139	85	100	4	3	0	16.8	47	6600	213		1.6	0	65	4	1	1	0	0	0	0	1	0	0	0	0	1	0	0	6	0
1	83.6849	0.01	161	82	78	3	3	0	11.8	35	6000	91	15	0.7	0	50	4	1	1	0	0	0	1	0	0	1	1	0	0	0	0	5	0
0	88.6137	0.01	122	65	71	3	3	0	14.6	44	15550	197		1	0	25	4	1	1	0	0	1	1	0	1	0	0	0	0	0	0	36	0
1	62.7041	0.01	129	82	91	3	3	0	15.3	45	9450	164	28	2.1	0	85	4	1	1	0	0	0	0	1	1	0	0	1	1	0	0	6	0
1	76	0.01	219	104	75	4	3	0	12.2	36	4060	230		1	0	45	4	1	1	0	0	0	1	0	0	1	1	0	0	0	0	24	0
1	54.3041	0.01	155	99	83	6	3	4	16	44	5560	260	30	2.2	0	35	4	1	1	0	0	0	0	1	0	0	0	1	1	0	0	16	0
0	76.537	0.01	199	69	72	5	3	0	9.8	32	7600	368	15	1.5	0	65	4	1	1	0	0	1	1	0	0	1	1	0	0	0	0	28	0
0	88.6849	0.01	121	79	80	23	4	2	10.5	35	7700	262	14	1.1	0	15	4	1	1	0	0	1	1	0	0	1	1	0	0	1	0	15	0
0	84.6795	0.01	155	79	74	6	4	2	11.8	35	8530	146	17	1.4	0	50	4	1	1	0	0	1	1	0	1	1	1	0	0	0	0	14	0
1	88.0877	0.01	158	72	47	4	4	2	11.5	34	6370	248		1.4	0	60	4	1	1	0	0	0	1	0	0	1	1	0	0	0	0	25	0
1	51.9808	0.01	212	132	88	4	4	2	18.6	56	7030	204	29	1.2	0	60	4	1	1	0	0	0	0	1	0	0	0	1	0	0	0	28	0
0	70.0411	0.17	125	81	85	4	4	2	10.4	33	6800	232	44	5.9	0	60	4	1	1	1	2	1	0	1	0	1	1	1	1	0	0	19	1
1	51.2411	0.01	122	84	93	6	4	1	13.3	41	7100	184	14	0.7	0	55	4	1	1	0	0	0	0	1	0	0	0	0	0	0	0	6	0
1	69.3945	0.01	181	95	41	16	4	1	14	41	9110	129		1.1	1	40	4	1	1	0	0	0	0	0	1	0	0	0	0	1	0	66	0
0	47.3151	0.01	187	104	85	7	4	1	9	28	9330	130	31	2.3	0	60	4	1	1	0	0	1	0	1	1	1	1	1	1	0	0	19	0
1	79.9041	0.13	202	105	86	5	4	1	16.9	52	8100	209	30	1.4	0	50	4	1	1	1	2	0	1	1	0	0	0	1	0	0	0	43	1
0	80.4575	0.01	165	111	81	6	4	0	13	39	11000	129	29	0.9	0	50	4	1	1	0	0	1	1	0	1	1	0	1	0	0	0	18	0
0	81.8329	0.01	116	62	96	6	4	0	13.3	41	7500	103	12	0.8	0	25	4	1	1	0	0	1	1	1	0	0	0	0	0	0	0	19	0
1	77.7863	0.01	140	80	65	8	4	0	14.7	44	8800	157	14	1.2	0	45	4	1	1	0	0	0	1	0	1	0	0	0	0	0	0	30	0
0	90.7151	0.01	199	99	80	4	4	0	11.5	37	7100	100	33	1	0	40	4	1	1	0	0	1	1	0	0	1	1	1	0	0	0	25	0
0	91.4411	0.01	171	78	65	4	4	0	13.7	42	12200	157	26	1.2	0	45	4	1	1	0	0	1	1	0	1	0	0	1	0	0	0	29	0
0	67.3096	0.01	175	82	112	7	4	0	11.6	37	9800	149	18	1.6	0	70	4	1	1	0	0	1	0	1	1	1	1	0	1	0	0	39	0
0	58.0986	0.01	181	109	74	4	4	0	14.7	43	7400	406		0.9	0	55	4	1	1	0	0	1	0	0	0	0	0	0	0	0	0	18	0
0	72.2521	0.01	163	99	86	6	4	0	13.7	41	6700	139	28	1	0	40	4	1	1	0	0	1	0	1	0	0	0	1	0	0	0	27	0
1	90.8932	0.01	167	87	80	6	4	0	11.8	35	2900	113		1.1	0	25	4	1	1	0	0	0	1	0	0	1	1	0	0	0	0	34	0
0	83.8466	0.01	127	77	87	7	4	0	12.7	38	7040	99	19	1	0	45	4	1	1	0	0	1	1	1	1	1	1	0	0	0	0	7	0
0	72.1918	0.01	229	85	68	4	4	0	8.6	26	8100	187		1.5	0	65	4	1	1	0	0	1	0	0	0	1	1	0	0	0	0	8	0
0	83.1534	0.01	140	76	94	5	4	0	13.2	38	11430	156	8	1	0	60	4	1	1	0	0	1	1	1	1	0	1	0	0	0	0	11	0
1	54.8959	0.02	193	95	74	4	4	0	9.3	32	5000	151	31	6.9	0	50	4	1	1	1	1	0	0	0	0	1	1	1	1	0	0	12	0
1	80.5726	0.01	166	99	101	6	4	3	10.8	32	6890	177	17	1.6	0	30	4	1	1	0	0	0	1	1	0	1	1	0	1	0	0	9	0
1	78.3151	0.53	206	116	109	19	4	0	14.5	42	7230	111		1.5	0	80	4	1	1	1	2	0	1	1	0	0	0	0	0	1	0	16	1
0	82.9041	0.01	204	92	70	7	5	2	12.7	38	4690	116		1	0	50	4	1	1	0	0	1	1	0	0	1	1	0	0	0	0	9	0
0	79.2384	0.16	153	101	88	11	5	2	13.5	40	10840	174	25	0.9	0	55	4	1	1	1	2	1	1	1	1	0	0	1	0	0	0	24	1
1	67.2712	0.01	226	79	79	15	5	1	10.8	33	11000	141	52	7.9	0	45	4	1	1	0	0	0	0	0	1	1	1	1	1	1	0	24	0
0	68.663	0.01	184	64	92	7	5	1	10.8	32	9700	184		1.6	0	50	4	1	1	0	0	1	0	1	1	1	1	0	1	0	0	27	0
1	87.7836	0.01	105	64	76	5	5	1	13.3	39	6700	175	17	1.2	0	45	4	1	1	0	0	0	1	0	0	0	0	0	0	0	0	28	0
1	63.0027	0.01	155	84	66	6	5	1	14.3	43	9560	115	21	1	0	50	4	1	1	0	0	0	0	0	1	0	0	0	0	0	0	50	0
1	90.4986	0.01	188	99	74	6	5	1	12.2	37	5550	109		1.1	0	70	4	1	1	0	0	0	1	0	0	1	1	0	0	0	0	26	0
0	76.0356	0.01	162	88	86	5	5	1	12.6	36	11310	312	17	1.4	0	60	4	1	1	0	0	1	1	1	1	1	1	0	0	0	0	19	0
0	85.863	0.01	116	81	86	8	5	1	8.5	26	9830	128		1	0	40	4	1	1	0	0	1	1	1	1	1	1	0	0	0	0	6	0
1	77.3041	0.01	202	110	93	8	5	1	14.4	42	9920	131	37	1.3	0	20	4	1	1	0	0	0	1	1	1	0	0	1	0	0	0	30	0
0	70.5562	0.01	147	100	68	2	5	1	13.2	34	5940	96		0.9	1	55	4	1	1	0	0	1	0	0	0	0	1	0	0	0	0	48	0
0	83.7616	0.01	165	81	65	5	5	0	11.7	37	7200		27	1.4	0	45	4	1	1	0	0	1	1	0	0	1	1	1	0	0	0	42	0
0	81.9397	0.01	164	87	80	5	5	0	10.7	33	6900	144		0.8	0	75	4	1	1	0	0	1	1	0	0	1	1	0	0	0	0	29	0
0	82.6082	0.01	161	94	81	13	5	0	13.6	40	8100	175	14	1.1	0	50	4	1	1	0	0	1	1	0	0	0	0	0	0	1	0	40	0
0	78.5534	0.01	155	82	64	7	5	0	14.1	42	8000	239	26	1.2	0	40	4	1	1	0	0	1	1	0	0	0	0	1	0	0	0	29	0
0	73.9452	0.01	200	98	83	8	5	0	14	37	7900	358	14	0.8	0	55	4	1	1	0	0	1	0	1	0	0	1	0	0	0	0	11	0
1	56.6055	0.01	220	133	98	5	5	0	16.2	46	10380	156	15	1.1	1	65	4	1	1	0	0	0	0	1	1	0	0	0	0	0	0	53	0
0	52.4904	0.01	182	111	77	5	5	0	14.8	42	6500	110		0.7	0	60	4	1	1	0	0	1	0	0	0	0	0	0	0	0	0	29	0
0	64.4274	0.01	140	83	70	7	5	0	12.7	37	9040	176	18	0.9	0	85	4	1	1	0	0	1	0	0	1	1	1	0	0	0	0	23	0
1	59.8137	0.01	121	82	62	6	5	0	15.1	42	6280	117	18	1.3	0	45	4	1	1	0	0	0	0	0	0	0	0	0	0	0	0	33	0
1	68.6411	0.01	174	95	85	5	5	0	13.1	41	11320	409		1.2	0	35	4	1	1	0	0	0	0	1	1	1	0	0	0	0	0	10	0
0	75.8658	0.01	193	97	65	5	5	0	15.2	43	7120	326		0.9	0	25	4	1	1	0	0	1	0	0	0	0	0	0	0	0	0	51	0
1	77.8603	0.05	105	60	74	9	5	0	12.6	36	6800	116	42	2.5	0	10	4	1	1	1	1	0	1	0	0	1	1	1	1	0	0	15	0
0	62.7973	0.2	189	107	68	4	5	0	10.6	31	5310	215	27	6.6	0	60	4	1	1	1	2	1	0	0	0	1	1	1	1	0	0	20	1
1	57.5973	1.36	200	113	80	8	5	0	13.2	37	6500		13	0.8	0	40	4	1	1	1	2	0	0	0	0	0	1	0	0	0	0	16	1
1	78.4932	0.01	156	90	89	14	6	2	13.9	40	8060	114		1	0	45	4	1	1	0	0	0	1	1	0	0	0	0	0	1	0	20	0
1	91.811	0.01	106	64	84	9	6	1	10.5	30	4500	103	29	1.8	0	30	4	1	1	0	0	0	1	1	0	1	1	1	1	0	0	29	0
0	69.9397	0.01	197	97	85	7	6	1	13.9	41	5900	270		0.8	1	25	4	1	1	0	0	1	0	1	0	0	0	0	0	0	0	28	0
0	77.4904	0.01	175	78	50	13	6	1	12.6	38	9300	123	17	0.9	0	35	4	1	1	0	0	1	1	0	1	1	1	0	0	1	0	19	0
1	73.7836	0.01	186	105	93	9	6	1	15.7	46	16700		9	1.4	0	25	4	1	1	0	0	0	0	1	1	0	0	0	0	0	0	27	0
1	74.0137	0.01	158	86	98	3	6	1	17.1	48	5500	144		1.7	1	50	4	1	1	0	0	0	0	1	0	0	0	0	1	0	0	49	0
0	53.6411	0.01	193	75	93	8	6	1	14.9	46	5900	243	10	0.6	1	60	4	1	1	0	0	1	0	1	0	0	0	0	0	0	0	19	0
0	79.5151	0.01	171	93	76	8	6	1	13.5	40	7000	259		1.1	0	50	4	1	1	0	0	1	1	0	0	0	0	0	0	0	0	5	0
0	76.7096	0.01	163	81	59	8	6	1	12.8	40	6000	133	21	1.2	0	45	4	1	1	0	0	1	1	0	0	1	0	0	0	0	0	36	0
0	76.863	0.01	165	73	60	6	6	1	8.8	24	8920	97	40	2.9	0	60	4	1	1	0	0	1	1	0	1	1	1	1	1	0	0	5	0
1	89.4329	0.01	155	91	105	10	6	1	11.7	34	5940	104	21	1.4	1	50	4	1	1	0	0	0	1	1	0	1	1	0	0	0	0	27	0
0	72.2438	0.01	192	89	73	6	6	1	12.6	37	7680	132	15	0.8	1	25	4	1	1	0	0	1	0	0	0	1	1	0	0	0	0	5	0
0	73.2137	0.63	137	80	71	6	6	1	12.3	36	8400	134	12	0.9	0	55	4	1	1	1	2	1	0	0	1	1	1	0	0	0	0	10	1
1	74.8247	0.01	177	87	63	10	6	0	11.7	37	10400	171	14	0.8	0	55	4	1	1	0	0	0	0	0	1	1	1	0	0	0	0	17	0
1	73.7452	0.01	190	82	84	9	6	0	13.7	42	5000	197	17	1	0	30	4	1	1	0	0	0	0	1	0	0	0	0	0	0	0	29	0
0	72.4247	0.01	188	106	57	4	6	0	13	39	8300	155	11	0.9	1	55	4	1	1	0	0	1	0	0	0	1	0	0	0	0	0	38	0
0	83.7288	0.01	230	105	105	10	6	0	13.9	42	3800	114	23	1.4	0	25	4	1	1	0	0	1	1	1	0	0	0	0	0	0	0	19	0
1	54.3315	0.01	160	99	87	4	6	0	16.7	50	10500	126	15	0.9	0	40	4	1	1	0	0	0	0	1	1	0	0	0	0	0	0	22	0
0	84.189	0.01	174	106	76	11	6	0	15.1	43	9000		15	0.8	0	10	4	1	1	0	0	1	1	0	1	0	0	0	0	0	0	7	0
0	78.4986	0.01	172	75	86	9	6	0	9.8	33	6900		9	2.6	0	60	4	1	1	0	0	1	1	1	0	1	1	0	1	0	0	11	0
0	77.2082	0.01	155	88	59	6	6	0	12.2	36	6800	163	16	0.7	0	55	4	1	1	0	0	1	1	0	0	1	1	0	0	0	0	7	0
1	64.611	0.01	126	89	72	10	6	0	13.8	40	8300	52	26	1	0	40	4	1	1	0	0	0	0	0	0	0	0	1	0	0	0	19	0
0	83.6082	0.01	146	87	67	9	6	0	13	38	9600	68	24	0.7	0	40	4	1	1	0	0	1	1	0	1	1	1	0	0	0	0	12	0
1	60.7068	0.01	217	105	98	10	6	0	11.8	35	6530	319	25	1.2	1	60	4	1	1	0	0	0	0	1	0	1	1	1	0	0	0	28	0
1	84.7479	0.01	101	59	78	7	6	0	12	36	6040	342	19	1.6	0	25	4	1	1	0	0	0	1	0	0	1	1	0	1	0	0	14	0
0	47.4521	0.01	167	104	105	9	6	0	13.8	41	8040	591	12	1	0	60	4	1	1	0	0	1	0	1	0	0	0	0	0	0	0	5	0
0	87.2658	0.01	148	84	82	10	6	0	15	44	9850	113	17	0.6	0	45	4	1	1	0	0	1	1	1	1	0	0	0	0	0	0	29	0
1	89.4027	0.02	184	76	76	3	6	0	15.4	45	8800	119	14	0.8	1	45	4	1	1	1	1	0	1	0	1	0	0	0	0	0	0	57	0
1	75.2521	0.01	130	67	63	6	6	4	12.9	35	7890	154	17	1.2	0	65	4	1	1	0	0	0	0	0	0	1	1	0	0	0	0	30	0
1	74.3452	0.02	154	78	100	12	6	4	8.6	26	4040	156	49	3.5	0	40	4	1	1	1	1	0	0	1	0	1	1	1	1	1	0	12	0
1	65.1863	0.01	185	104	86	6	6	0	13.8	41	7500	228		1.2	0	60	4	1	1	0	0	0	0	1	0	0	0	0	0	0	0	5	0
1	72.7671	0.01	106	92	67	9	6	0	9.3	30	5200	127		1	0	60	4	1	1	0	0	0	0	0	0	1	1	0	0	0	0	8	0
1	80.6137	0.01	149	100	88	18	7	2	13.6	40	7000	124		1.2	0	60	4	1	1	0	0	0	1	1	0	0	0	0	0	1	0	10	0
1	78.9616	0.01	177	89	87	9	7	1	14.4	42	12700	129	27	1.8	0	40	4	1	1	0	0	0	1	1	1	0	0	1	1	0	0	53	0
0	85.2986	0.01	202	82	60	7	7	1	14	42	5900	175	15	1	0	65	4	1	1	0	0	1	1	0	0	0	0	0	0	0	0	11	0
1	80.8466	0.01	205	120	105	11	7	1	13.4	39	6800	107	28	1.1	0	10	4	1	1	0	0	0	1	1	0	0	0	1	0	0	0	33	0
0	76.0329	0.01	206	105	50	8	7	1	13	39	7200	122	12	0.7	0	50	4	1	1	0	0	1	1	0	0	1	0	0	0	0	0	27	0
0	66.7945	0.01	94	72	70	6	7	1	13.7	39	8980	108	10	0.6	1	25	4	1	1	0	0	1	0	0	1	0	0	0	0	0	0	42	0
0	64.8521	0.01	152	92	82	9	7	1	11.5	34	10710	280		1.2	0	50	4	1	1	0	0	1	0	1	1	1	1	0	0	0	0	23	0
1	65.4548	0.06	164	70	88	9	7	1	12.9	38	8200	215	31	2	0	35	4	1	1	1	1	0	0	1	0	1	1	1	1	0	0	29	0
1	71.7151	0.01	154	95	90	10	7	0	13.5	42	11200	216	18	1.6	0	20	4	1	1	0	0	0	0	1	1	0	0	0	1	0	0	38	0
0	78.326	0.01	233	113	74	7	7	0	12.2	38	5100	105	13	1.5	1	35	4	1	1	0	0	1	1	0	0	1	1	0	0	0	0	21	0
1	65.5918	0.01	156	85	63	3	7	0	14	41	5200	128	13	0.8	0	55	4	1	1	0	0	0	0	0	0	0	0	0	0	0	0	14	0
0	72.1699	0.01	227	91	84	5	7	0	14.4	42	9500	172		0.7	0	45	4	1	1	0	0	1	0	1	1	0	0	0	0	0	0	28	0
0	83.9616	0.01	193	70	66	7	7	0	12.1	36	7000	147	20	1.7	0	50	4	1	1	0	0	1	1	0	0	1	1	0	1	0	0	20	0
0	81.2384	0.01	217	110	60	6	7	0	11.6	38	7000	112	19	1.2	1	40	4	1	1	0	0	1	1	0	0	1	1	0	0	0	0	19	0
1	71.6192	0.01	194	94	88	8	7	0	12.3	35	6230	140	18	1.1	0	65	4	1	1	0	0	0	0	1	0	1	1	0	0	0	0	31	0
1	55.2247	0.01	157	84	56	7	7	0	14.2	41	8630	139		1.4	1	60	4	1	1	0	0	0	0	0	1	0	0	0	0	0	0	51	0
0	78.6849	0.01	177	82	74	7	7	0	14.2	42	7500	196	14	0.9	0	40	4	1	1	0	0	1	1	0	0	0	0	0	0	0	0	6	0
1	71.537	0.03	167	119	79	20	8	2	15.3	45	9850	95	19	1.8	0	25	4	1	1	1	1	0	0	0	1	0	0	0	1	1	0	55	0
1	59.8192	0.01	160	112	91	4	8	1	13.3	40	9000	99	21	1.2	1	35	4	1	1	0	0	0	0	1	1	0	0	0	0	0	0	4	0
0	78.7863	0.01	139	86	78	11	8	1	11.6	36	4000	113	23	0.9	0	45	4	1	1	0	0	1	1	0	0	1	1	0	0	0	0	25	0
0	42.7836	0.01	155	96	52	17	8	1	13.9	39	9600	146	12	1	0	55	4	1	1	0	0	1	0	0	1	0	0	0	0	1	0	30	0
0	83.6959	0.01	139	91	79	16	8	1	15.6	46	14660	140	29	1.3	0	45	4	1	1	0	0	1	1	0	1	0	0	1	0	1	0	24	0
0	52.0493	0.01	240	130	94	0	8	1	11.4	34	5630		55	8.1	0	65	4	1	1	0	0	1	0	1	0	1	1	1	1	0	0	39	0
1	50.8822	0.01	141	85	83	10	8	1	17.6	50	10200	133	10	1	0	60	4	1	1	0	0	0	0	1	1	0	0	0	0	0	0	22	0
0	56.7562	0.01	155	87	121	11	8	1	9.8	32	10380	223	70	0.9	0	15	4	1	1	0	0	1	0	1	1	1	1	1	0	0	0	15	0
1	91.7096	0.01	150	89	76	9	8	0	10.8	33	9400	106	24	1.3	0	35	4	1	1	0	0	0	1	0	1	1	1	0	0	0	0	23	0
1	82.1397	0.01	191	99	74	11	8	0	10.9	32	4400	151		1.2	0	30	4	1	1	0	0	0	1	0	0	1	1	0	0	0	0	39	0
1	66.463	0.01	180	124	105	11	8	0	16.6	50	12720	132	11	1.1	0	50	4	1	1	0	0	0	0	1	1	0	0	0	0	0	0	27	0
0	48.9452	0.01	126	95	97	10	8	0	15.1	45	7710	247	13	0.4	0	40	4	1	1	0	0	1	0	1	0	0	0	0	0	0	0	27	0
0	84.5096	0.02	210	99	64	12	9	2	12.7	40	6100	131	29	1.2	0	30	4	1	1	1	1	1	1	0	0	1	0	1	0	1	0	19	0
0	77.9178	0.01	217	103	75	12	9	1	14.4	41	5400			0.9	0	40	4	1	1	0	0	1	1	0	0	0	0	0	0	1	0	21	0
1	86.726	0.01	174	115	95	10	9	1	14.4	44	12670	117		2	0	25	4	1	1	0	0	0	1	1	1	0	0	0	1	0	0	3	0
0	67.9671	0.88	163	106	76	13	9	1	10.3	30	8800	104	7	0.6	0	45	4	1	1	1	2	1	0	0	1	1	1	0	0	1	0	29	1
1	60.9918	0.01	175	95	70	4	9	0	13.4	41	7600	243	15	1.2	1	20	4	1	1	0	0	0	0	0	0	0	0	0	0	0	0	11	0
1	56.8849	0.01	184	116	70	9	9	0	16.4	47	9290	102	20	1.3	0	45	4	1	1	0	0	0	0	0	1	0	0	0	0	0	0	7	0
1	49.6411	0.01	160	116	92	11	7	0	14.2	42	7870	133	16	0.9	0	30	4	1	1	0	0	0	0	1	0	0	0	0	0	0	0	4	0
1	70.5014	0.25	171	105	69	10	9	0	16.2	47	8800	123	27	2.5	0	20	4	1	1	1	2	0	0	0	1	0	0	1	1	0	0	5	1
1	48.3342	0.01	119	93	84	11	9	0	14.2	42	4700	179	19	1.6	0	55	4	1	1	0	0	0	0	1	1	0	0	0	1	0	0	4	0
0	89.5397	0.01	139	72	82	10	10	2	12.2	37	6990	103	18	1.2	0	25	4	1	1	0	0	1	1	1	0	1	1	0	0	0	0	14	0
0	79.4384	0.01	175	72	43	9	10	2	15.7	46	4470	99	12	1	0	45	4	1	1	0	0	1	1	0	0	0	0	0	0	0	0	19	0
0	49.3288	0.01	111	91	91	12	10	1	8.6	31	6900		14	0.7	0	35	4	1	1	0	0	1	0	1	0	1	1	0	0	1	0	20	0
1	64.0575	0.01	107	90	68	11	10	0	14.2	43	4500		12	0.9	0	60	4	1	1	0	0	0	0	0	0	0	0	0	0	0	0	6	0
0	85.8849	0.03	145	71	87	18	10	4	15.3	45	8400	121	11	1	0	20	4	1	1	1	1	1	1	1	1	0	0	0	0	1	0	21	0
1	33.0685	0.01	174	120	66	11	11	1	14.7	44	15980	148	11	1.1	0	35	4	1	1	0	0	0	0	0	1	0	0	0	0	0	0	29	0
0	57.6411	0.01	261	123	77	12	11	1	14.8	43	7210	389	16	0.9	1	45	4	1	1	0	0	1	0	0	0	0	0	0	0	1	0	18	0
1	92.2247	0.07	153	106	102	16	11	1	12.6	37	6800	147		0.9	0	20	4	1	1	1	1	0	1	1	0	1	1	0	0	1	0	19	0
1	77.4384	0.39	155	104	94	11	11	1	12.5	38	7280	124		1.7	0	55	4	1	1	1	2	0	1	1	0	1	1	0	1	0	0	3	1
0	90.6356	7.24	150	92	74	25	11	1	12.2	37	9700	144		1.7	0	15	4	1	1	1	2	1	1	0	1	1	1	0	1	1	0	32	1
1	55.9014	0.01	144	74	89	17	11	0	11.8	33	8200	493	14	1.2	0	10	4	1	1	0	0	0	0	1	0	1	1	0	0	1	0	29	0
0	69.7178	0.01	171	90	100	11	11	0	12.7	36	8720	112	14	0.6	0	40	4	1	1	0	0	1	0	1	1	1	1	0	0	0	0	7	0
1	63.5205	0.01	143	65	58	16	12	2	13.8	41	4700	125	32	1.2	0	60	4	1	1	0	0	0	0	0	0	0	0	1	0	1	0	61	0
1	59.9699	0.01	151	86	94	13	12	2	14.2	41	10410	162	20	1.5	1	20	4	1	1	0	0	0	0	1	1	0	0	0	0	1	0	50	0
0	80.2849	0.01	197	103	66	17	12	1	14.7	43	6760	107	18	1.3	0	55	4	1	1	0	0	1	1	0	0	0	0	0	0	1	0	13	0
1	84.8329	0.04	193	98	79	12	12	1	13	38	7200	120	14	1	0	45	4	1	1	1	1	0	1	0	0	1	1	0	0	1	0	11	0
1	85.1589	0.01	121	83	60	13	13	1	9.4	28	4100	93	19	1.3	0	30	4	1	1	0	0	0	1	0	0	1	1	0	0	1	0	47	0
0	60.5918	0.56	144	99	111	14	13	1	15.9	48	12900	310	24	0.9	0	15	4	1	1	1	2	1	0	1	1	0	0	0	0	1	0	30	1
0	83.874	0.01	123	71	75	13	13	0	8.6	29	2600	176	15	0.7	0	50	4	1	1	0	0	1	1	0	0	1	1	0	0	1	0	15	0
1	58.4521	0.01	191	97	60	18	13	0	13.7	39	11200	136	14	1.2	0	35	4	1	1	0	0	0	0	0	1	0	0	0	0	1	0	37	0
0	77.4164	0.8	136	82	74	14	14	0	12.3	38	4350	103	36	5.8	0	55	4	1	1	1	2	1	1	0	0	1	1	1	1	1	0	13	1
0	82.611	0.01	210	87	58	7	15	2	12.4	38	4040	134	20	1.3	1	30	4	1	1	0	0	1	1	0	0	1	1	0	0	0	0	52	0
1	67.4082	0.01	133	76	62	15	15	1	14.1	40	6200				0	15	4	1	1	0	0	0	0	0	0	0	0	0	0	1	0	20	0
1	82.3452	0.26	117	86	105	18	16	2	12.8	36	8720	151	14	0.9	0	35	4	1	1	1	2	0	1	1	1	1	1	0	0	1	0	26	1
0	78.3973	0.01	159	80	109	23	17	2	11.5	34	5200	153	33	1.5	0	35	4	1	1	0	0	1	1	1	0	1	1	1	0	1	0	6	0
0	76.6137	0.01	166	132	153	20	17	2	13.9	40	8750	121		0.9	1	35	4	1	1	0	0	1	1	1	1	0	0	0	0	1	0	31	0
1	76.2575	0.01	184	88	74	17	17	1	17.2	50	6950	97	23	1.4	1	35	4	1	1	0	0	0	1	0	0	0	0	0	0	1	0	58	0
0	72.2411	0.01	126	83	100	22	18	1	12	37	7000	115	19	0.7	0	15	4	1	1	0	0	1	0	1	0	1	1	0	0	1	0	33	0
0	80.074	0.01	122	70	62	20	19	2	13.6	41	4570	115	18	0.8	1	0	4	1	1	0	0	1	1	0	0	0	0	0	0	1	0	29	0
1	35.7068	0.01	164	81		22	19	1	15.9	46	9400	259	18	1.2	0	35	4	1	1	0	0	0	0	0	1	0	0	0	0	1	0	43	0
0	53.3781	0.01	141	85	80	22	22	1	13.8	31	6400	141	14	0.8	0	40	4	1	1	0	0	1	0	0	0	0	1	0	0	1	0	43	0
0	82.2301	0.6	140	70	78	26	24	1	8.1	24	7140	176	57	5.4	0	30	4	1	1	1	2	1	1	0	0	1	1	1	1	1	0	20	1
1	86.2027	0.01	134	84	81	25	25	2	11.5	33	4890	116	27	1.5	0	35	4	1	1	0	0	0	1	0	0	1	1	1	0	1	0	30	0
1	94.3096	0.01	141	82	124	18	13	2	13.5	39	10480	147	24	1.8	0	0	5	1	1	0	0	0	1	1	1	0	1	0	1	1	0	43	0
0	76.8795	0.01	156	76	131	28	23	2	12.2	37	14080	157	19	0.8	1	20	4	1	1	0	0	1	1	1	1	1	1	0	0	1	0	78	0
0	76.9041	0.01	144	82	87	21	9	2	15.1	42	13640	211		1.1	0	45	4	1	1	0	0	1	1	1	1	0	0	0	0	1	0	20	0
0	93.3781	0.01	221	117	66	1	1	2	13.7	39	5930	119		1	0	95	1	1	1	0	0	1	1	0	0	0	0	0	0	0	0	10	0
0	91.8521	0.01	155	85	68	19	17	2	14.3	43	7420	95		1.7	0	0	5	1	1	0	0	1	1	0	0	0	0	0	1	1	0	29	0
0	82.589	0.01	151	104	95	19	15	2	9.6	30	5750	103		1.9	0	0	5	1	1	0	0	1	1	1	0	1	1	0	1	1	0	7	0
0	76.6986	0.93	202	102	80	8	6	2	10.2	30	16260	292	77	5.8	0	80	3	1	1	1	2	1	1	0	1	1	1	1	1	0	0	16	1
1	55.5644	0.01	155	89	106	6	6	1	18	52	12380	197	41	0.9	0	30	4	1	1	0	0	0	0	1	1	0	0	1	0	0	0	22	0
0	85.6219	0.01	177	88	54	15	12	1	13.9	40	8650	188	45	1.3	0	50	4	1	1	0	0	1	1	0	1	0	0	1	0	1	0	43	0
1	55.0466	0.01	168	100	90	4	7	1	16.2	47	6110	141		0.9	1	70	4	1	1	0	0	0	0	1	0	0	0	0	0	0	0	12	0
0	91.3205	0.01	165	75	80	4	4	1	15	44	7240	193		1.4	0	65	4	1	1	0	0	1	1	0	0	0	0	0	0	0	0	51	0
1	70.9068	0.03	198	100	79	7	5	1	14.7	40	11450	122		1.1	1	25	4	1	1	1	1	0	0	0	1	0	0	0	0	0	0	16	0
0	95.3151	0.04	153	74	74	5	4	1	10.8	33	5840	77	28	1.6	0	15	4	1	1	1	1	1	1	0	0	1	1	1	1	0	0	14	0
0	83.0438	0.07	164	80	91	14	10	1	10.3	32	6350	234	28	6	1	35	4	1	1	1	1	1	1	1	0	1	1	1	1	1	0	5	0
1	88.0027	0.01	235	120	73	10	6	0	12.9	39	7310	108	20	1.2	0	25	4	1	1	0	0	0	1	0	0	1	0	0	0	0	0	6	0
1	90.8411	0.01	164	84	69	3	3	0	12.8	38	6360	134	15	1.3	0	55	4	1	1	0	0	0	1	0	0	1	1	0	0	0	0	13	0
0	89.3096	0.01	160	84	50	2	2	0	15.1	45	5430	111	13	0.7	0	100	1	1	1	0	0	1	1	0	0	0	0	0	0	0	0	13	0
0	80.5589	0.01	180	109	117	15	9	3	14.1	41	10860	117	18	1.2	0	25	4	1	1	0	0	1	1	1	1	0	0	0	0	1	0	23	0
1	81.0438	0.01	117	64	97	9	7	0	9.3	28	9900	261	38	1.7	0	30	4	1	1	0	0	0	1	1	1	1	1	1	1	0	0	17	0
1	50.1397	0.01	162	87	69			0	13.6	39	11040	211	20	5	0	45	4	1	1	0	0	0	0	0	1	0	0	0	1	0	0	27	0
1	89.6521	0.01	157	86	55	7	6	0	15.6	45	7740	105	17	1.2	0	60	4	1	1	0	0	0	1	0	0	0	0	0	0	0	0	25	0
0	79.6575	0.01	150	92	88	3	2	0	12	35	7940	99		1	0	30	4	1	1	0	0	1	1	1	0	1	1	0	0	0	0	16	0
0	58.3233	0.01	197	94	67	2	6	0	14.8	43	6330	104	9	0.7	0	60	4	1	1	0	0	1	0	0	0	0	0	0	0	0	0	66	0
0	78.5233	0.01	155	103	65	4	2	0	12.4	36	13220	129	22	1.3	0	75	3	1	1	0	0	1	1	0	1	1	1	0	0	0	0	23	0
1	63.3945	0.01	186	96	98	9	8	0	15.2	44	8580	262		0.8	0	35	4	1	1	0	0	0	0	1	1	0	0	0	0	0	0	49	0
1	84.0904	0.01	134	74	93	7	5	0	13.3	37	8650	101		1.1	0	40	4	1	1	0	0	0	1	1	1	0	1	0	0	0	0	29	0
1	60.926	0.01	182	96	84	7	7	0	11.9	34	5930	144		1.1	0	60	4	1	1	0	0	0	0	1	0	1	1	0	0	0	0	13	0
0	75.2219	0.01	152	98	76	8	6	0	10.9	33	5330	250		0.8	0	50	4	1	1	0	0	1	0	0	0	1	1	0	0	0	0	20	0
0	92.8137	0.08	177	80	80	12	4	0	8.4	27	3920	108	16	0.8	0	70	4	1	1	1	1	1	1	0	0	1	1	0	0	1	0	6	0
0	84.8986	0.14	159	95	55			0	12.4	36	11330	113	19	0.9	1	10	4	1	1	1	2	1	1	0	1	1	1	0	0	0	0	26	1
0	74.9753	0.04	126	63	58	5	0	1	12.5	39	7670	156		1	1	30	5	1	1	1	1	1	0	0	0	1	1	0	0	0	0	55	0
0	70.863	0.01	166	91	87	3	1	0	12.7	38	8060	84		0.7	0	20	5	1	1	0	0	1	0	1	0	1	1	0	0	0	0	27	0
1	90.9479	0.01	121	66	80	13	2	0	15.4	43	11930	147		1.4	0	10	5	1	1	0	0	0	1	0	1	0	0	0	0	1	0	5	0
0	91.2767	0.15	122	60	89	10	4	1	9.3	29	12500	146	13	0.7	0	0	5	1	1	1	2	1	1	1	1	1	1	0	0	0	0	8	1
1	80.5945	0.01	145	91	86	7	4	0	10.8	33	6100		22	1.5	0	25	5	1	1	0	0	0	1	1	0	1	1	0	0	0	0	8	0
0	88.3479	0.01	142	80	72	6	4	0	14.3	42	9400	127	13	1	0	0	5	1	1	0	0	1	1	0	1	0	0	0	0	0	0	35	0
1	77.6795	0.01	190	85	88	13	4	0	14.5	42	13200		68	2.5	0	20	5	1	1	0	0	0	1	1	1	0	0	1	1	1	0	14	0
1	67.2767	0.01	102	71	99	24	4	0	16	45	10000	188	8	1	0	0	5	1	1	0	0	0	0	1	0	0	0	0	0	1	0	24	0
0	80.3288	0.16	151	80	84	5	5	2	13.1	38	8750	282	20	1.7	0	5	5	1	1	1	2	1	1	1	1	1	1	0	1	0	0	28	1
1	67.2795	0.01	145	96	84	8	5	1	14.8	43	11700	227	17	1.2	0	5	5	1	1	0	0	0	0	1	1	0	0	0	0	0	0	36	0
1	82.8384	0.15	180	102	88	13	5	1	12.8	38	11000	210		1	1	20	5	1	1	1	2	0	1	1	1	1	1	0	0	1	0	40	1
0	77.411	0.01	181	89	68	16	5	0	11.3	34	5900		27	1.1	0	0	5	1	1	0	0	1	1	0	0	1	1	1	0	1	0	6	0
0	82.2247	0.08	146	78	80	5	5	0	9.5	29	6600		57	2.7	0	10	5	1	1	1	1	1	1	0	0	1	1	1	1	0	0	13	0
0	92.4137	0.01	105	54	78	7	6	1	13.5	41	10300	147		0.9	0	20	5	1	1	0	0	1	1	0	1	0	0	0	0	0	0	24	0
0	86.5562	0.01	187	87	70	18	6	0	10.4	30	10500		5	0.5	0	15	5	1	1	0	0	1	1	0	1	1	1	0	0	1	0	8	0
1	81.3479	0.01	228	125	64	3	6	0	15.6	45	8900	207	18	1.2	0	0	5	1	1	0	0	0	1	0	1	0	0	0	0	0	0	30	0
1	88.2219	0.01	126	86	89	10	6	0	13.7	38	5130	222		1.8	0	5	5	1	1	0	0	0	1	1	0	0	1	0	1	0	0	22	0
1	94.8986	0.01	171	74	63	11	7	2	11	33	5000	104		1.8	0	0	5	1	1	0	0	0	1	0	0	1	1	0	1	0	0	46	0
0	92.9288	0.04	210	87	64	16	7	2	13	39	10320	170	28	1.4	0	20	5	1	1	1	1	1	1	0	1	1	0	1	0	1	0	16	0
1	79.7863	0.07	162	65	90	15	7	1	12.3	37	8600	194	58	7.4	0	10	5	1	1	1	1	0	1	1	1	1	1	1	1	1	0	16	0
1	78.4493	0.01	165	91	94	17	7	0	17.1	47	7320	147	15	1.4	0	10	5	1	1	0	0	0	1	1	0	0	0	0	0	1	0	19	0
1	83.9288	0.01	149	61	59	14	7	0	12.3	35	9770	137	18	1.1	0	0	5	1	1	0	0	0	1	0	1	1	1	0	0	1	0	15	0
0	90.8356	0.01	113	51	96	12	7	0	10.1	30	10900	110	14	0.7	0	5	5	1	1	0	0	1	1	1	1	1	1	0	0	1	0	21	0
0	76.3945	0.01	81	43	95	13	8	2	12.3	38	5370	151	18	1	0	5	5	1	1	0	0	1	1	1	0	1	1	0	0	1	0	24	0
1	45.8137	0.01	154	105	68	5	8	1	14.7	43	6030	135	15	1	1	0	5	1	1	0	0	0	0	0	0	0	0	0	0	0	0	27	0
0	73.326	0.01	151	73	68	9	8	0	12.4	39	6200	125	30	1.9	0	20	5	1	1	0	0	1	0	0	0	1	0	1	1	0	0	9	0
0	87.6137	0.05	146	99	148	10	8	0	13.2	38	5200		16	1.1	0	5	5	1	1	1	1	1	1	1	0	0	1	0	0	0	0	19	0
1	64.1863	0.14	165	72	80	8	8	0	19.2	53	10520	166		1.3	0	0	5	1	1	1	2	0	0	0	1	0	0	0	0	0	0	27	1
1	76.9425	0.06	232	132	79	15	9	2	14.8	43	8300	116	22	1.7	0	15	5	1	1	1	1	0	1	0	0	0	0	0	1	1	0	22	0
0	73.9425	0.01	121	60	54	9	9	0	11.5	36	7510	125	19	0.7	0	10	5	1	1	0	0	1	0	0	0	1	1	0	0	0	0	6	0
1	74.2603	0.01	85	63	106	18	9	0	13.2	40	19000	116	35	1.2	1	10	5	1	1	0	0	0	0	1	1	0	0	1	0	1	0	14	0
1	84.874	0.01	158	89	62	10	9	0	13.1	37	13110	189	32	1.9	0	0	5	1	1	0	0	0	1	0	1	1	1	1	1	0	0	56	0
1	84.6384	0.01	228	88	97	9	9	0	12.7	37	7990	148		1	0	35	5	1	1	0	0	0	1	1	0	1	1	0	0	0	0	1	0
0	79.9479	0.01	142	79	89	1	9	0	11.6	35	6250	150		1.1	1	15	5	1	1	0	0	1	1	1	0	1	1	0	0	0	0	27	0
0	93.0247	0.14	161	79	76	9	9	0	12	39	12700	198	43	1	0	20	5	1	1	1	2	1	1	0	1	1	1	1	0	0	0	13	1
0	88.0986	0.01	221	107	105	12	10	1	15	44	10160	195		0.9	0	10	5	1	1	0	0	1	1	1	1	0	0	0	0	1	0	20	0
1	78.3945	0.32	174	86	75	16	10	1	15.1	45	5780	129		1.4	0	20	5	1	1	1	2	0	1	0	0	0	0	0	0	1	0	32	1
1	70.3973	0.01	151	86	88	12	10	0	14.6	44	10000		15	0.9	0	15	5	1	1	0	0	0	0	1	1	0	0	0	0	1	0	8	0
1	91.8986	0.01	154	91	64	17	10	0	14	41	10300	116	25	1.1	0	5	5	1	1	0	0	0	1	0	1	0	0	1	0	1	0	28	0
0	57.0712	0.03	260	118	75	14	11	2	17.1	48	7040	145	17	1.1	0	20	5	1	1	1	1	1	0	0	0	0	0	0	0	1	0	2	0
1	91.5096	0.08	148	89	86	15	11	2	13.7	40	9190			1.3	0	15	5	1	1	1	1	0	1	1	1	0	0	0	0	1	0	42	0
0	86.7918	1.54	113	69	71	11	11	2	13.1	38	10000	156	35	1.6	1	15	5	1	1	1	2	1	1	0	0	1	1	1	1	0	0	35	1
1	70.7151	0.01	189	99	74	14	11	1	13.7	40	11000	110	23	1.4	0	10	5	1	1	0	0	0	0	0	1	0	0	0	0	1	0	60	0
0	92	0.11	124	72	120	23	11	0	11.9	40	11130	180		2.8	0	10	5	1	1	1	2	1	1	1	1	1	0	0	1	1	0	11	1
1	87.8219	0.42	150	94	96	14	11	0	15.3	47	18150	139	30	1.3	0	10	5	1	1	1	2	0	1	1	1	0	0	1	0	1	0	39	1
0	79.3452	0.01	145	88	63	8	11	3	14.6	39	9120	173	16	0.9	0	10	5	1	1	0	0	1	1	0	1	0	0	0	0	0	0	22	0
1	82.6247	0.01	186	97	68	15	12	2	16.7	48	10420	133		0.9	0	5	5	1	1	0	0	0	1	0	1	0	0	0	0	1	0	56	0
0	85.1479	0.01	160	121	109	15	12	2	13.2	39	4690	109	16	1.1	0	10	5	1	1	0	0	1	1	1	0	0	1	0	0	1	0	49	0
0	84.2027	0.01	220	132	119	20	12	1	11.4	33	7760	125	23	1.1	0	5	5	1	1	0	0	1	1	1	0	1	1	0	0	1	0	17	0
1	75.7753	0.01	143	78	62	15	12	0	14.3	41	5700	143		1.2	1	10	5	1	1	0	0	0	0	0	0	0	0	0	0	1	0	117	0
0	85.2384	0.01	151	63	102	14	12	0	10.5	31	9910	99	125	12.4	0	5	5	1	1	0	0	1	1	1	1	1	1	1	1	1	0	11	0
0	94.8384	10.68	130	75	75	12	12	0	11.8	36	7920		31	0.9	0	5	5	1	1	1	2	1	1	0	0	1	1	1	0	1	0	34	1
1	30.3918	0.01	177	121	88	12	12	0	17.8	51	11200	249	29	1.2	0	10	5	1	1	0	0	0	0	1	1	0	0	1	0	1	0	30	0
1	85.8959	0.08	100	60	57	12	12	0	14.8	42	4400	74	23	1.4	0	5	5	1	1	1	1	0	1	0	0	0	0	0	0	1	0	23	0
0	87.0301	0.01	161	87	109	13	13	1	8.4	25	8610	114		0.6	0	5	5	1	1	0	0	1	1	1	1	1	1	0	0	1	0	37	0
1	61.9288	0.01	125	82	69	19	13	1	15	40	7290	388	12	0.8	1	10	5	1	1	0	0	0	0	0	0	0	0	0	0	1	0	26	0
1	93.8986	0.01	149	73	68	16	13	1	12.3	36	4620	94	18	1.3	0	25	5	1	1	0	0	0	1	0	0	1	1	0	0	1	0	25	0
0	72.4	0.6	146	77	100	19	13	1	15.5	44	12000		16	0.7	1	10	5	1	1	1	2	1	0	1	0	0	0	0	0	1	0	37	1
0	80.0986	0.01	160	69	80	10	13	0	9.8	30	5000		17	1.1	0	0	5	1	1	0	0	1	1	0	0	1	1	0	0	0	0	46	0
1	85.7918	0.01	152	78	62	14	13	0	11.5	34	6210	130		1.2	0	25	5	1	1	0	0	0	1	0	0	1	1	0	0	1	0	6	0
0	89.0027	0.01	183	109	105	14	14	1	11.1	34	3000	104	18	0.7	0	0	5	1	1	0	0	1	1	1	0	1	1	0	0	1	0	28	0
0	63.2548	0.01	158	89	86	17	14	1	15.1	44	12000	130	17	0.8	0	10	5	1	1	0	0	1	0	1	1	0	0	0	0	1	0	16	0
0	93.0082	0.01	171	103	89	16	14	1	13.7	39	4310	86	14	0.8	0	5	5	1	1	0	0	1	1	1	0	0	1	0	0	1	0	26	0
0	94.9151	0.24	149	60	96	19	14	1	8.8	27	13860	988	95	3.6	0	10	5	1	1	1	2	1	1	1	1	1	1	1	1	1	0	42	1
0	91.7699	0.01	144	68	72	14	14	0	13.4	42	6900	94	19	1.1	0	10	5	1	1	0	0	1	1	0	0	0	0	0	0	1	0	7	0
0	86.8493	0.01	136	76	77	8	14	0	12.2	35	7040	194		0.7	1	5	5	1	1	0	0	1	1	0	0	1	1	0	0	0	0	32	0
0	81.1342	0.01	170	95	98	16	15	2	15.9	48	6000	219	19	1	1	0	5	1	1	0	0	1	1	1	0	0	0	0	0	1	0	30	0
1	88.2247	0.01	91	56	78	17	15	2	10.9	32	4590	189	30	1.5	0	0	5	1	1	0	0	0	1	0	0	1	1	1	0	1	0	17	0
0	95.1315	0.98	217	137	106	20	15	2	13.1	39	2960	141	21	0.8	1	10	5	1	1	1	2	1	1	1	0	1	1	0	0	1	0	29	1
1	77.1041	0.05	124	77	74	11	15	1	13.1	46	5000	144	15	1.4	1	0	5	1	1	1	1	0	1	0	0	1	0	0	0	0	0	31	0
1	90.3288	0.01	140	60	62	18	15	0	15	42	13900		17	0.8	0	0	5	1	1	0	0	0	1	0	1	0	0	0	0	1	0	18	0
0	85.8438	0.01	137	91	96	15	15	0	10.6	32	6490	227	27	1.3	0	0	5	1	1	0	0	1	1	1	0	1	1	1	0	1	0	7	0
1	76.8603	0.01	170	101	87	16	15	4	13.7	41	8740	117	12	1	0	0	5	1	1	0	0	0	1	1	1	0	0	0	0	1	0	34	0
0	90.2877	0.01	171	114	74	19	16	2	14.1	41	7670	134	13	1	0	30	5	1	1	0	0	1	1	0	0	0	0	0	0	1	0	25	0
0	77.7014	0.01	171	105	70	14	16	2	13.3	39	5770	119		1.1	0	5	5	1	1	0	0	1	1	0	0	0	0	0	0	1	0	29	0
0	63.3452	0.01	199	110	131	16	16	1	15.8	45	7600	196	13	1.1	0	0	5	1	1	0	0	1	0	1	0	0	0	0	0	1	0	30	0
0	87.8548	0.23	168	101	101	17	16	0	10.3	30	7500	112	23	1.2	0	0	5	1	1	1	2	1	1	1	0	1	1	0	0	1	0	29	1
0	78.1726	0.01	175	74	57	7	16	4	12.5	38	7130	127		0.7	1	15	5	1	1	0	0	1	1	0	0	1	1	0	0	0	0	26	0
0	80.1068	0.01	168	96	101	23	17	2	11.1	33	10500	235	29	1.2	1	0	5	1	1	0	0	1	1	1	1	1	1	1	0	1	0	30	0
0	87.6849	0.01	200	102	78	26	17	2	12.7	40	8700	102	17	1	0	0	5	1	1	0	0	1	1	0	1	1	0	0	0	1	0	28	0
0	91.7452	0.01	175	89	83	19	17	2	15.9	47	8230	120	12	0.9	1	5	5	1	1	0	0	1	1	1	0	0	0	0	0	1	0	30	0
1	62.9342	0.01	145	88	81	18	17	1	15.5	47	6970	132	22	1.1	0	5	5	1	1	0	0	0	0	0	0	0	0	0	0	1	0	2	0
0	88.5315	0.01	234	136	73	17	18	1	12.9	41	7480	138	19	0.8	0	0	5	1	1	0	0	1	1	0	0	1	0	0	0	1	0	9	0
0	85.0658	0.01	131	110	80	18	18	1	11.2	34	5930	98	18	0.9	0	10	5	1	1	0	0	1	1	0	0	1	1	0	0	1	0	34	0
1	66.5808	0.08	155	77	80	26	18	1	18.2	52	9600	276	16	1.6	0	0	5	1	1	1	1	0	0	0	1	0	0	0	1	1	0	73	0
0	84.8767	0.01	181	80	74	19	18	0	14.1	43	7000	109	11	1.1	0	0	5	1	1	0	0	1	1	0	0	0	0	0	0	1	0	43	0
0	79.6795	0.01	94	49	96	24	18	0	13.5	39	7600	158	16	1.3	0	25	5	1	1	0	0	1	1	1	0	0	0	0	0	1	0	28	0
0	85.3178	0.01	207	105	140	18	19	2	14.3	43	5140	143		0.7	0	0	5	1	1	0	0	1	1	1	0	0	0	0	0	1	0	35	0
0	88.1342	0.01	121	67	78	26	19	1	11.2	34	4400	107	13	0.8	0	5	5	1	1	0	0	1	1	0	0	1	1	0	0	1	0	38	0
0	95.274	0.01	196	107	107	20	19	1	12.1	35	8970	380	28	1.2	0	5	5	1	1	0	0	1	1	1	1	1	1	1	0	1	0	40	0
0	74.9233	0.01	191	112	70	21	19	1	16	45	11420	162	21	0.7	0	0	5	1	1	0	0	1	0	0	1	0	0	0	0	1	0	29	0
0	79.0795	0.01	149	132	96	20	19	1	13.8	39	6190	187		0.9	0	0	5	1	1	0	0	1	1	1	0	0	1	0	0	1	0	20	0
0	80.6521	0.01	146	76	71	24	19	1	10.4	29	8420	137	20	1.2	0	0	5	1	1	0	0	1	1	0	1	1	1	0	0	1	0	10	0
1	96.2575	0.01	135	87	95	11	19	0	17.4	51	16500	244	29	0.9	1	0	5	1	1	0	0	0	1	1	1	0	0	1	0	0	0	122	0
0	90.9671	0.01	103	58	78	21	19	0	13.3	41	9600		18	1	0	0	5	1	1	0	0	1	1	0	1	0	0	0	0	1	0	34	0
1	74.0027	0.01	159	105	108	23	20	2	11.5	34	12470	169	24	1.6	1	5	5	1	1	0	0	0	0	1	1	1	1	0	1	1	0	25	0
1	81.6712	0.05	209	109	82	38	20	2	14.6	44	10380	97	30	3.1	1	0	5	1	1	1	1	0	1	1	1	0	0	1	1	1	0	42	0
0	80.6384	0.01	142	65	62	27	20	1	11.7	35	6000	101	20	1.2	0	10	5	1	1	0	0	1	1	0	0	1	1	0	0	1	0	10	0
1	85.1452	0.01	161	84	107	19	20	1	14.7	43	11470	199	17	0.9	0	10	5	1	1	0	0	0	1	1	1	0	0	0	0	1	0	13	0
0	86.4904	0.01	135	88	89	29	20	1	8.8	29	6100	117	16	1.2	0	30	5	1	1	0	0	1	1	1	0	1	1	0	0	1	0	23	0
1	79.7342	0.01	226	91	58	24	20	0	15.7	44	7600	104	21	1.5	0	0	5	1	1	0	0	0	1	0	0	0	0	0	0	1	0	26	0
1	91.0329	0.01	140	73	93	25	21	1	12.7	38	4200	162	20	0.9	0	0	5	1	1	0	0	0	1	1	0	1	1	0	0	1	0	79	0
0	95.1589	0.04	127	94	97	20	22	2	11.4	34	3260	133	21	0.8	0	5	5	1	1	1	1	1	1	1	0	1	1	0	0	1	0	100	0
0	70.0055	0.47	144	64	66	22	22	2	13.1	36	8080	156	19	0.8	0	30	5	1	1	1	2	1	0	0	0	1	1	0	0	1	0	14	1
0	80.2192	0.01	170	82	70	21	22	1	10.3	31	6700	512	25	4.9	0	0	5	1	1	0	0	1	1	0	0	1	1	1	1	1	0	28	0
0	86.474	0.01	178	88	99	22	22	1	8.3	24	8790	232	33	1.3	0	0	5	1	1	0	0	1	1	1	1	1	1	1	0	1	0	19	0
0	90.7973	0.03	180	115	128	28	22	1	11.5	35	5360	87	21	0.9	0	0	5	1	1	1	1	1	1	1	0	1	1	0	0	1	0	15	0
0	71.3479	0.14	176	89	76	25	22	1	9.1	27	9390	77	61	7	0	0	5	1	1	1	2	1	0	0	1	1	1	1	1	1	0	16	1
1	91.4329	0.01	127	75	108	34	22	0	12.9	36	13900	42		2.4	0	0	5	1	1	0	0	0	1	1	1	1	1	0	1	1	0	41	0
1	71.2493	0.01	165	107	85	23	23	2	18	50	7920	136		1.4	0	10	5	1	1	0	0	0	0	1	0	0	0	0	0	1	0	28	0
1	78.0932	0.01	151	92	68	21	23	2	15.4	45	4560	114	17	1	0	15	5	1	1	0	0	0	1	0	0	0	0	0	0	1	0	34	0
1	75.2877	0.01	160	68	104	23	23	1	13.8	45	5100	160	14	1.1	0	0	5	1	1	0	0	0	0	1	0	0	0	0	0	1	0	37	0
1	57.2795	0.01	236	138	70	7	23	1	16.9	48	6110	323	14	0.9	1	5	5	1	1	0	0	0	0	0	0	0	0	0	0	0	0	29	0
1	82.0164	0.01	165	96	68	26	24	2	13.4	38	7400	107	30	1.2	0	5	5	1	1	0	0	0	1	0	0	0	1	1	0	1	0	30	0
0	64.6219	0.01	133	69	82	27	25	2	15.1		11000	150	25	0.8	0	0	5	1	1	0	0	1	0	1	1	0	1	1	0	1	0	7	0
0	73.211	0.01	140	88	90	26	25	1	10.2		6000	133	29	1	0	5	5	1	1	0	0	1	0	1	0	1	1	1	0	1	0	39	0
0	91.5041	0.01	157	109	87	27	25	1	12.5	36	13050	155	33	1.5	0	5	5	1	1	0	0	1	1	1	1	1	1	1	0	1	0	20	0
1	87.4521	0.01	143	106	110	16	25	1	13.9	40	11540	143		2	0	0	5	1	1	0	0	0	1	1	1	0	0	0	1	1	0	34	0
1	54.8986	0.12	211	103	66	29	25	1	16.6	48	10000	260	19	1.7	1	0	5	1	1	1	2	0	0	0	1	0	0	0	1	1	0	15	1
1	85.9781	0.01	157	82	124	32	26	2	14.1	43	12050	237	21	1.4	0	10	5	1	1	0	0	0	1	1	1	0	0	0	0	1	0	52	0
0	93.5863	0.02	223	121	82	29	26	1	12.9	39	8680	168	18	1.4	0	0	5	1	1	1	1	1	1	1	1	1	1	0	0	1	0	18	0
1	80.4055	0.01	151	69	64	32	26	4	13	37	11800	101		1.2	0	0	5	1	1	0	0	0	1	0	1	1	1	0	0	1	0	43	0
0	80.8548	0.01	141	59	56	26	27	2	11.3	34	6460	128	22	1.2	0	0	5	1	1	0	0	1	1	0	0	1	1	0	0	1	0	48	0
0	92.6466	0.05	198	100	77	28	27	1	11.8	36	3600		24	1	0	0	5	1	1	1	1	1	1	0	0	1	1	0	0	1	0	34	0
1	72.3945	0.09	140	64	81	27	27	1	12.8	39	4000	152	37	5.6	0	0	5	1	1	1	1	0	0	0	0	1	1	1	1	1	0	19	0
1	82.5452	0.01	203	126	115	30	28	2	14.6	42	9860	163	24	1.2	0	0	5	1	1	0	0	0	1	1	1	0	0	0	0	1	0	32	0
0	90.0384	0.09	110	66	79	28	28	2	12.2	37	9680		32	0.9	0	5	5	1	1	1	1	1	1	0	1	1	1	1	0	1	0	47	0
0	76.8466	0.01	187	85	82	30	29	2	12.8	40	10300	133	23	1.3	0	5	5	1	1	0	0	1	1	1	1	1	0	0	0	1	0	36	0
0	98.6219	0.32	202	113	65	29	29	2	15.2	42	16770	212	16	1.2	0	5	5	1	1	1	2	1	1	0	1	0	0	0	0	1	0	27	1
1	49.0603	0.01	166	92	98	30	29	0	13.7	41	15100		20	1.4	0	0	5	1	1	0	0	0	0	1	1	0	0	0	0	1	0	47	0
1	65.2521	0.01	226	103	80	28	29	4	15.8	46	12000	146	32	1.9	0	0	5	1	1	0	0	0	0	0	1	0	0	1	1	1	0	8	0
0	76.1479	0.11	172	85	84	30	30	1	14.1	41	10300	113	25	1.4	1	0	5	1	1	1	2	1	1	1	1	0	0	1	0	1	0	41	1
1	76.9753	0.01	106	75	96	29	30	3	10	30	11050	165	28	1.1	0	0	5	1	1	0	0	0	1	1	1	1	1	1	0	1	0	47	0
0	61.6301	0.01	194	101	89	32	30	4	13.8	41	8170	185	17	1.1	0	0	5	1	1	0	0	1	0	1	0	0	0	0	0	1	0	22	0
0	81.7699	0.01	100	67	85	26	30	0	15.6	45	5190	115	17	0.8	0	0	5	1	1	0	0	1	1	1	0	0	0	0	0	1	0	77	0
0	85.074	0.01	146	73	73	31	32	2	10.3	31	7050	247		2.1	0	0	5	1	1	0	0	1	1	0	0	1	1	0	1	1	0	49	0
0	78.8	0.13	136	76	66	32	32	2	8.7	27	5500	189	49	5.1	0	0	5	1	1	1	2	1	1	0	0	1	1	1	1	1	0	50	1
0	64.789	0.01	204	99	96	26	33	2	8.9	27	12500	375	90	2.9	0	5	5	1	1	0	0	1	0	1	1	1	1	1	1	1	0	23	0
1	63.5233	0.11	120	53	68	33	33	2	13.4	44	7900	124	51	2.2	1	0	5	1	1	1	2	0	0	0	0	0	0	1	1	1	0	19	1
1	94.3562	0.01	177	98	75	33	33	1	13.5	39	6770	118	16	1.6	0	0	5	1	1	0	0	0	1	0	0	0	0	0	1	1	0	33	0
1	74.1178	0.03	220	96	82	36	35	2	9.9	30	11630	139	56	8.1	0	0	5	1	1	1	1	0	0	1	1	1	1	1	1	1	0	48	0
1	63.789	0.01	136	90	98	36	36	1	16.1	49	11080	187	34	1.2	0	0	5	1	1	0	0	0	0	1	1	0	0	1	0	1	0	39	0
0	74.5288	0.05	169	96	84	36	36	1	14.1	44	7000	153	39	0.9	0	5	5	1	1	1	1	1	0	1	0	0	0	1	0	1	0	18	0
0	76.8986	0.91	139	79	88	15	36	1	12.7	40	9840	189		0.9	1	0	5	1	1	1	2	1	1	1	1	1	0	0	0	1	0	3	1
0	71.8795	0.01	165	82	129	32	39	1	11.9	34	8600		16	0.5	1	0	5	1	1	0	0	1	0	1	1	1	1	0	0	1	0	47	0
0	72.5534	0.01	177	114	110	40	40	2	14	42	7130	150		1	0	0	5	1	1	0	0	1	0	1	0	0	0	0	0	1	0	28	0
1	49.0767	0.01	204	104	106	17	40	1	11.1	41	10700	276	38	3.1	1	0	5	1	1	0	0	0	0	1	1	1	0	1	1	1	0	15	0
0	86.6137	0.01	161	98	86	16	40	1	9	28	15040	197	49	5.1	1	0	5	1	1	0	0	1	1	1	1	1	1	1	1	1	0	37	0
0	54.3288	0.07	128	86	74	9	41	4	11.8	34	6680	102		0.7	0	0	5	1	1	1	1	1	0	0	0	1	1	0	0	0	0	12	0
1	74.3644	0.01	139	127	96	8	42	0	13.1	38	11500	259		1.5	0	0	5	1	1	0	0	0	0	1	1	1	1	0	0	0	0	6	0
1	66.3123	0.01	189	102	82	3	4	0	16.8	45	6000	364	37	1.8	0	0	5	1	1	0	0	0	0	1	0	0	0	1	1	0	0	32	0
0	60.6932	0.08	165	79	83			2	10.9	34	10010				1	5	5	1	1	1	1	1	0	1	1	1	1	0	0	0	0	1	0
1	89.8	0.23	178	126	70	20	20	2	15.3	44	11380	115	18	1.2	0	0	5	1	1	1	2	0	1	0	1	0	0	0	0	1	0	45	1
0	79.6658	0.01	147	71	50	22	22	1	13.1	41	13810	250		0.8	0	0	5	1	1	0	0	1	1	0	1	1	0	0	0	1	0	35	0
1	61.263	0.01	226	122	98	2	27	1	16.4	44	8010	285		1	1	10	5	1	1	0	0	0	0	1	0	0	0	0	0	0	0	26	0
0	58.8493	1.55	132	70	65	10		1	9.9	32	9300	25	63	6.8	0	0	6	1	1	1	2	1	0	0	1	1	1	1	1	0	0	21	1
0	70.3781	0.01	184	104	85	12	11	0	8.6	26	5240		13	0.7	0	0	5	1	1	0	0	1	0	1	0	1	1	0	0	1	0	25	0
0	75.6986	0.01	184	106	108	7	10	0	15.2	44	12930	123		1.1	1	40	4	1	1	0	0	1	0	1	1	0	0	0	0	0	0	35	0
0	75.8986	0.08	144	79	106	23	23	0	11.2	35	9000	318	18	1.5	1	10	5	1	1	1	1	1	0	1	0	1	1	0	0	1	0	74	0
0	86.5973	0.04	176	82	103	25	12	3	13.2	39	14800	121	66	2.2	0	10	5	1	1	1	1	1	1	1	1	0	1	1	1	1	0	54	0
0	82.4384	0.01	98	59	98	16	11	0	11.1	37	11350	309	100	3.8	0	10	5	1	1	0	0	1	1	1	1	1	1	1	1	1	0	10	0
1	84.2055	0.01	196	119	100			0	13.3	38	5720	108	13	1.3	0	25	5	1	1	0	0	0	1	1	0	0	1	0	0	0	0	26	0
0	87.5753	0.01	227	114	105	20	23	0	12.2	36	14650	262	23	1.4	0	0	5	1	1	0	0	1	1	1	1	1	1	0	0	1	0	74	0
0	66.5808	0.01	175	81	74	3	0	0	11.6	33	4230	117		0.9	0	100	0	1	1	0	0	1	0	0	0	1	1	0	0	0	0	3	0
0	76.5671	0.01	160	105	85	19		0	13.5	40	7550	153		0.7	0	0	5	1	1	0	0	1	1	1	0	0	0	0	0	1	0	38	0
1	92.411	0.75	141	71	91	26	42	1	14.6	43	13800	125	24	1.1	0	0	6	1	1	1	2	0	1	1	1	0	0	0	0	1	0	50	1
1	62.1479	0.09	196	104	65	21	42	4	14.9	43	8700	136		2.2	1	0	6	1	1	1	1	0	0	0	1	0	0	0	1	1	1	4	0
1	72.8	0.01	169	79	82	21	42	1	13.5	38	6710	188	23	1.5	1	0	6	1	1	0	0	0	0	1	0	0	1	0	0	1	1	4	0
1	85.8986	2.48	136	59	83	39	42	2	9.9	31	10200	138	54	2.4	1	0	6	1	1	1	2	0	1	1	1	1	1	1	1	1	1	9	1
1	72.1918	0.01	172	106	88	36	42	1	15.3	45	16800	118	19	1.5	1	0	6	1	1	0	0	0	0	1	1	0	0	0	0	1	1	3	0
1	78.0027	0.01	186	103	81	26	42	2	13	36	14500	162		1.4	1	0	6	1	1	0	0	0	1	0	1	1	1	0	0	1	1	3	0
1	55.6164	0.01	182	103	87	26	42	2	13.8	39	8560	205		1.4	1	0	6	1	1	0	0	0	0	1	1	0	0	0	0	1	1	2	0
1	82.411	0.02	137	72	81	25	42	2	10	31	10900	140	18	1.1	0	0	6	1	1	1	1	0	1	0	1	1	1	0	0	1	1	7	0
0	85.5425	0.05	218	86	81	23	42	2	10.9	31	4190	113		1.5	1	0	6	1	1	1	1	1	1	0	0	1	1	0	0	1	1	4	0
1	84.4329	0.2	73	56	135	4	42	2	12.1	36	6810	160	21	1	0	0	6	1	1	1	2	0	1	1	0	1	1	0	0	0	1	15	1
1	67.5288	1.65	148	99	114	40	42	2	12.9	40	18850	261	66	2.4	0	0	6	1	1	1	2	0	0	1	1	1	0	1	1	1	1	33	1
0	70.5589	0.01	153	69	70	13	42	1	14.1	41	9000	277	16	0.9	1	0	6	1	1	0	0	1	0	0	0	0	0	0	0	1	1	45	0
1	67.7945	0.01	178	93	55	28	42	1	13.2	39	9000	239	24	1	1	0	6	1	1	0	0	0	0	0	1	0	1	0	0	1	1	11	0
0	88.9589	0.01	244	120	61	0	42	1	13.4	41	8800	179		1.6	1	0	6	1	1	0	0	1	1	0	1	0	0	0	1	0	1	4	0
1	52.9534	0.01	190	106	96	34	42	1	16.1	48	18020	231	21	2	1	0	6	1	1	0	0	0	0	1	1	0	0	0	1	1	1	9	0
0	84.2959	0.01	189	80		21	42	1	13.2	39	8990	152	16	0.8	1	0	6	1	1	0	0	1	1	0	1	0	1	0	0	1	1	2	0
0	80.2438	0.01	162	84	96	23	42	1	6.2	21	6240	163	14	1	0	0	6	1	1	0	0	1	1	1	0	1	1	0	0	1	1	18	0
1	77.989	0.15	103	65	82	6	42	1	10.6	33	9000	100	25	4.7	0	0	6	1	1	1	2	0	1	1	1	1	1	1	1	0	1	46	1
1	83.3397	0.16	187	85	87	28	42	1	13.5	39	12000	153	21	1.2	1	0	6	1	1	1	2	0	1	1	1	0	0	0	0	1	1	7	1
1	80.9178	0.34	147	79	100	28	42	1	9.8	28	4000	104	28	1.5	0	0	6	1	1	1	2	0	1	1	0	1	1	1	0	1	1	24	1
1	84.9616	0.65	193	82	88	31	42	1	17.5	61	11800	257	33	1.9	0	0	6	1	1	1	2	0	1	1	1	0	0	1	1	1	1	59	1
1	82.8329	0.66	153	97	102	32	42	1	14.5	42	9300	170	15	1.4	1	0	6	1	1	1	2	0	1	1	1	0	0	0	0	1	1	28	1
1	81.7233	0.69	191	101	115	32	42	1	16.1	47	12170	164	21	1.7	0	0	6	1	1	1	2	0	1	1	1	0	0	0	1	1	1	26	1
1	56.8027	0.88	150	72	79	42	42	1	14.1	41	9790	136	31	2	1	0	6	1	1	1	2	0	0	0	1	0	0	1	1	1	1	1	1
1	94.1671	1.24	215	86	73	7	42	1	13.6	41	5940	170		1.7	1	0	6	1	1	1	2	0	1	0	0	0	0	0	1	0	1	22	1
1	70.6795	5.57	238	180	114	19	42	1	15.2	44	10800	149	19	1.1	1	0	6	1	1	1	2	0	0	1	1	0	0	0	0	1	1	2	1
1	57.3589	0.01	238	120	110	36	42	4	17.5	52	15500	87	21	1.4	1	0	6	1	1	0	0	0	0	1	1	0	0	0	0	1	1	2	0
1	71.4712	0.01	218	133	64		42	0	14.4	43	7380	106	28	1.5	0	0	6	1	1	0	0	0	0	0	0	0	0	1	0	0	1	4	0
0	89.8932	0.07	231	114	80	32	42	0	11.3	35	5800	195	23	1.2	0	0	6	1	1	1	1	1	1	0	0	1	1	0	0	1	1	32	0
0	74.5178	0.13	200	107	90	23	42	0	16.1	45	10720	304	20	1	1	0	6	1	1	1	2	1	0	1	1	0	0	0	0	1	1	18	1
0	69.2904	0.14	159	63	70	22	42	0	12.1	36	4500	355	32	4.8	0	0	6	1	1	1	2	1	0	0	0	1	1	1	1	1	1	18	1
1	80.8986	0.27	112	55	85	9	42	0	11.1	32	1300	90	36	2.1	0	0	6	1	1	1	2	0	1	1	0	1	1	1	1	0	1	2	1
								0:small										mRS 1-2:0	mRS 1-3:0	Tro>0.01:1	Trop>0.01: 1
								1:Large										mRS>2:1	mRS>3:1		Trop≥0.1: 2
								2:Cardio
								3:Special
								4:Undeter
